# Supplementary material for: Metal-free electrochemical synthesis of α-ketoamides via decarboxylative coupling of α-keto acids with isocyanides and water
Source: Royal Society of Chemistry journal article supplement (doi:10.1039/d1qo01351c), 2021-01-01

## Supplementary Information

### Metal-free electrochemical synthesis of $\alpha$ -ketoamides via decarboxylative coupling of $\alpha$ -keto acids with isocyanides and water

Feng Zhao,<sup>a</sup> Na Meng,<sup>c</sup> Ting Sun,<sup>a</sup> Jiangwei Wen<sup>c</sup>, Xiaohui Zhao<sup>\*b</sup> and Wei Wei,<sup>b,c\*</sup>

<sup>a</sup> Key Laboratory of Functional Organic Molecule, School of Chemistry and Materials Science, Guizhou Education University, Guiyang 550018, P. R. China.

<sup>b</sup> Qinghai Provincial Key Laboratory of Tibetan Medicine Research and CAS Key Laboratory of Tibetan Medicine Research, Northwest Institute of Plateau Biology, Qinghai 810008, China

<sup>c</sup>School of Chemistry and Chemical Engineering, Qufu Normal University, Qufu 273165, China

\* Corresponding author.

E-mail: weiweiqfnu@163.com; xhzhao@nwipb.cas.cn

#### Table of Content

|                                                                                                                                           |         |
|-------------------------------------------------------------------------------------------------------------------------------------------|---------|
| 1. General information .....                                                                                                              | S1      |
| 2. General procedure for electrochemical synthesis of $\alpha$ -ketoamides from $\alpha$ -oxocarboxylic acids, isocyanides and water..... | S2      |
| 3. Preliminary mechanistic studies .....                                                                                                  | S3-S7   |
| 3.1. The reaction of <b>1a</b> and <b>2a</b> was carried out in the absence of H <sub>2</sub> O.....                                      | S3      |
| 3.2. The reaction of <b>1a</b> and <b>2a</b> was carried out under H <sub>2</sub> O <sup>18</sup> .....                                   | S3-S4   |
| 3.3. The reaction of <b>1a</b> and <b>2a</b> in the presence of I <sub>2</sub> .....                                                      | S4      |
| 3.4. The reaction of <b>1a</b> and <b>2a</b> in the presence of NIS.....                                                                  | S4-S5   |
| 3.5. Cyclic voltammetry (CV) tests.....                                                                                                   | S5-S6   |
| 4. Characterization data of products <b>3a–3u</b> .....                                                                                   | S6-S13  |
| 5. Copies of NMR spectra for <b>3a–3u</b> .....                                                                                           | S14-S36 |

## 1. General information

All commercially available reagent grade chemicals were purchased from Aldrich, Acros, Bidepharm and Energy Chemical Company and used as received without further purification unless otherwise stated.  $^1\text{H}$  NMR and  $^{13}\text{C}$  NMR were recorded in  $\text{CDCl}_3$  on a Bruker Avance III spectrometer with TMS as internal standard (500/400 MHz  $^1\text{H}$ , 125/400 MHz  $^{13}\text{C}$ ) at room temperature, the chemical shifts ( $\delta$ ) were expressed in ppm and  $J$  values were given in Hz. The following abbreviations are used to indicate the multiplicity: singlet (s), doublet (d), triplet (t), quartet (q), doublet of doublets (dd), doublet of triplets (dt), and multiplet (m). All first order splitting patterns were assigned on the basis of the appearance of the multiplet. Splitting patterns that could not be easily interpreted were designated as multiplet (m). Mass analyses and HRMS were obtained on a Finnigan-LCQDECA mass spectrometer and a Bruker Daltonics Bio-TOF-Q mass spectrometer by the ESI method, respectively. Column chromatography was performed on silica gel (200-300 mesh). The instrument for electrolysis is dual-display potentiostat (DJS-292B) (made in China), the carbon rod (d: 6 mm), Pt (1.5 x 1.5 cm x 2) was purchased from Xuzhou Xinke Instrument and Meter Co. LTD.

## 2. General procedure for electrochemical synthesis of $\alpha$ -ketoamides from $\alpha$ -oxocarboxylic acids, isocyanides and water.

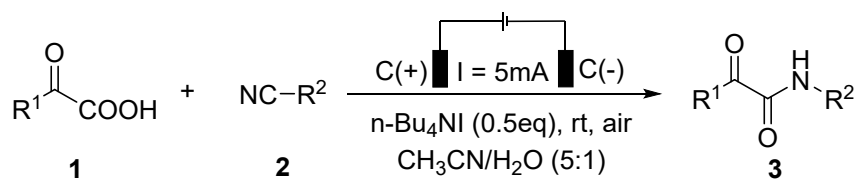

In an oven-dried undivided three-necked flask (25 mL) equipped with a stir bar,  $\alpha$ -oxocarboxylic acids **1** (0.2 mmol), isocyanide **2** (0.4 mmol),  $\text{n-Bu}_4\text{NI}$  (0.01 mmol) and  $\text{CH}_3\text{CN}/\text{H}_2\text{O}$  (5:1, 12 ml) were combined and added. The flask was equipped with graphite rod (d: 6.0 mm) anode and graphite rod cathode (distance between electrodes (5 - 10 mm)). The reaction mixture was stirred and electrolyzed at a constant current of 5 mA under room temperature for 5 h. After completion of the reaction, the solution was concentrated in vacuum. The residue was purified by flash column chromatography using a mixture of petroleum ether and ethyl acetate (10:1) as eluent to give the desired

product **3**.

### 3. Preliminary mechanistic studies

#### 3.1 The reaction of **1a** and **2a** was carried out in the absence of H<sub>2</sub>O.

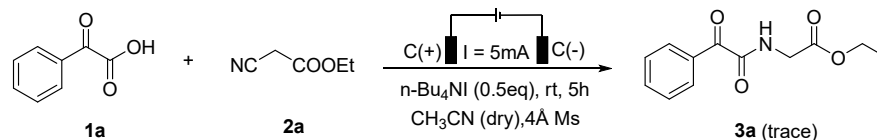

In an oven-dried undivided three-necked flask (25 mL) equipped with a stir bar,  $\alpha$ -oxocarboxylic acid **1** (0.2 mmol), isocyanide **2** (0.4 mmol), n-Bu<sub>4</sub>NI (0.01 mmol), 4 Å Ms and CH<sub>3</sub>CN (10 mL) were combined and added. The flask was equipped with graphite rod (d: 6.0 mm) anode and graphite rod cathode (distance between electrodes (5 - 10 mm)). The reaction mixture was stirred and electrolyzed at a constant current of 5 mA under room temperature for 5 h. After completion of the reaction, the solution was concentrated in vacuum, only a trace amount of the desired product **3a** was detected.

#### 3.2 The reaction of **1a** and **2a** was carried out under H<sub>2</sub>O<sup>18</sup>.

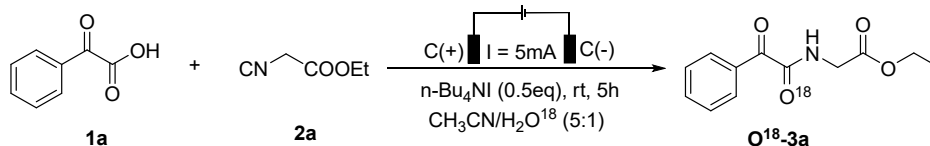

In an oven-dried undivided three-necked flask (25 mL) equipped with a stir bar,  $\alpha$ -oxocarboxylic acid **1a** (0.2 mmol), isocyanide **2a** (0.4 mmol), n-Bu<sub>4</sub>NI (0.01 mmol), CH<sub>3</sub>CN/H<sub>2</sub><sup>18</sup>O (5:1, 12 ml) were combined and added. The flask was equipped with graphite rod (d: 6.0 mm) anode and graphite rod cathode (distance between electrodes (5 - 10 mm)). The reaction mixture was stirred and electrolyzed at a constant current of 5 mA under room temperature for 5 h. After completion of the reaction, the solution was concentrated in vacuum. The residue was purified by flash column chromatography using a mixture of petroleum ether and ethyl acetate as eluent to give the desired product **<sup>18</sup>O-3a** (33.1mg, 70%).

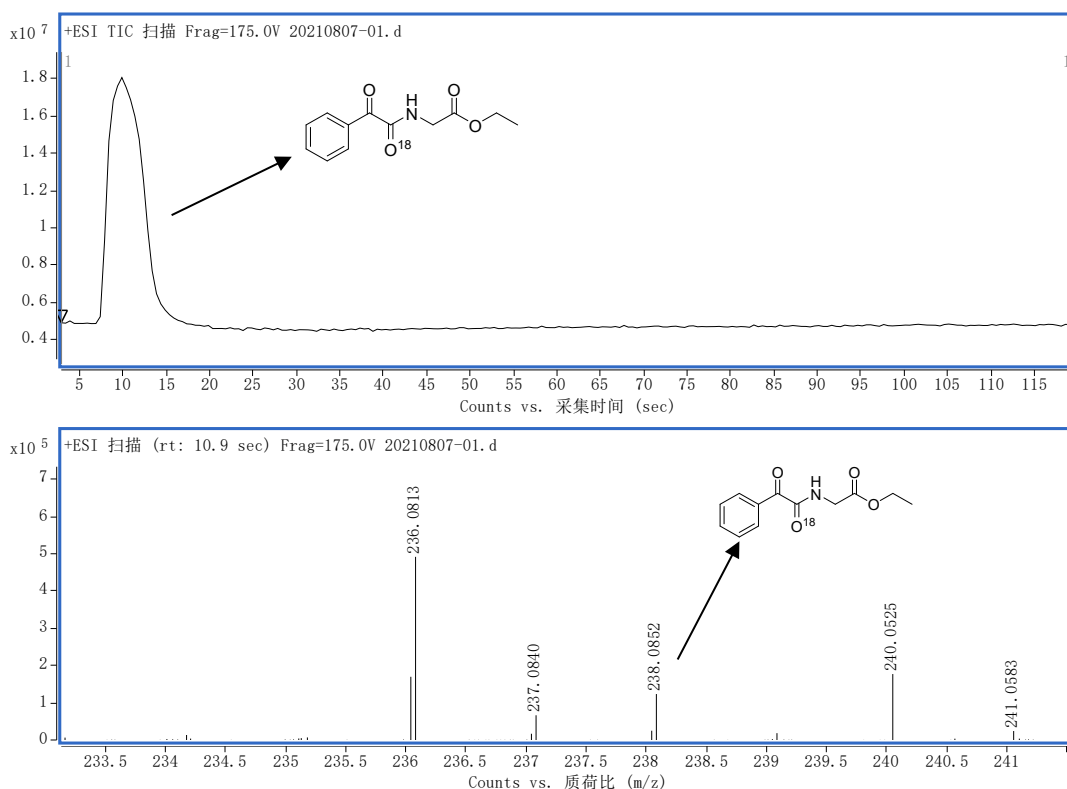

### 3.3 The reaction of **1a** and **2a** in the presence of **I<sub>2</sub>**.

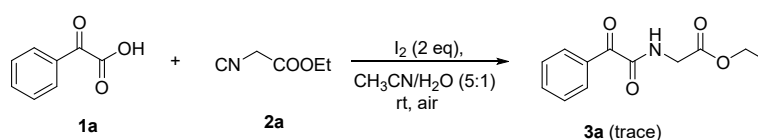

In an oven-dried undivided three-necked flask (25 mL) equipped with a stir bar,  $\alpha$ -oxocarboxylic acid **1a** (0.2 mmol), isocyanide **2a** (0.4 mmol), **I<sub>2</sub>** (0.4 mmol),  $\text{CH}_3\text{CN}/\text{H}_2\text{O}$  (5:1, 2.4 mL) were combined and added. The reaction mixture was stirred at room temperature for 24 h. After completion of the reaction, the solution was concentrated in vacuum. Only a trace amount of product **3a** was detected.

### 3.4 The reaction of **1a** and **2a** in the presence of NIS.

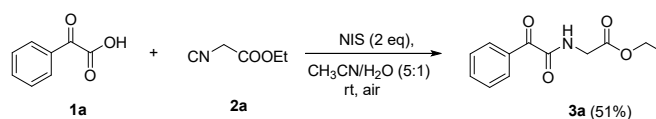

In an oven-dried undivided three-necked flask (25 mL) equipped with a stir bar,  $\alpha$ -oxocarboxylic acid **1a** (0.2 mmol), isocyanide **2a** (0.4 mmol), **NIS** (0.4 mmol),  $\text{CH}_3\text{CN}/\text{H}_2\text{O}$  (5:1, 2.4 mL) were combined and added. The reaction mixture was stirred at room temperature for 24 h. After completion of the reaction, the solution was

concentrated in vacuum. The residue was purified by flash column chromatography using a mixture of petroleum ether and ethyl acetate as eluent to give the desired product **3a** (23.8mg, 51%).

### 3.5 Cyclic voltammetry (CV) tests

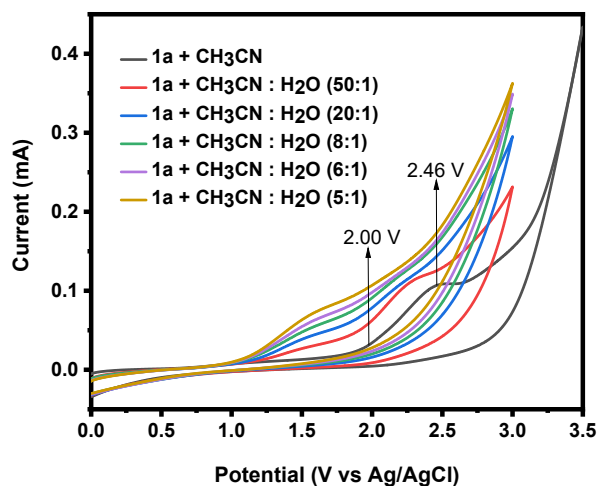

**Figure S1.** Conditions: glass carbon as work electrode, Pt plate (1.5 x 1.5 cm<sup>2</sup>) as conter electrode Ag/AgCl (KCl) as reference electrode in 0.1 M LiClO<sub>4</sub> with different solvent under **1a** (0.2 mM), the mixed solvent of CH<sub>3</sub>CN/H<sub>2</sub>O, scan rate: 100 mV s<sup>-1</sup>.

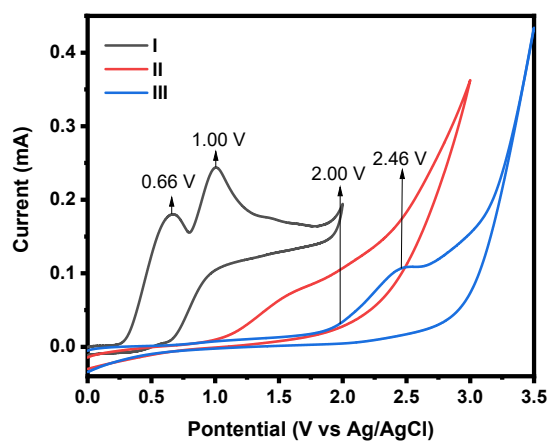

**Figure S2.** Conditions: glass carbon as work electrode, Pt plate (1.5 x 1.5 cm<sup>2</sup>) as conter electrode and Ag/AgCl (KCl) as reference electrode in 0.1 M LiClO<sub>4</sub> at 100 mV s<sup>-1</sup> : (I) 0.1 mM of n-Bu<sub>4</sub>NI, anhydrous CH<sub>3</sub>CN, (II) 0.2 mM of PhCOCOOH, CH<sub>3</sub>CN/H<sub>2</sub>O (5 : 1) and (III) 0.2 mM of PhCOCOOH, anhydrous CH<sub>3</sub>CN.

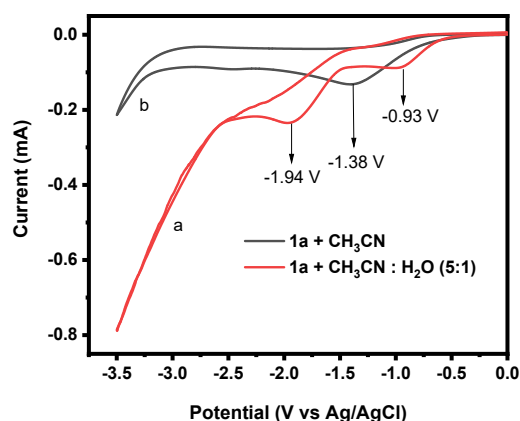

Figure S3. Cyclic voltammograms of 0.2 mM PhCOCO<sub>2</sub>H in 0.1 M LiClO<sub>4</sub> in (a) CH<sub>3</sub>CN/H<sub>2</sub>O (5 : 1), and (b) anhydrous CH<sub>3</sub>CN using glass carbon as the working electrode, Pt plate (1.5 x 1.5 cm<sup>2</sup>) and Ag/AgCl (KCl) as the counter and reference electrodes at 100 mV s<sup>-1</sup>.

#### 4. Characterization data of products 3a – 3u

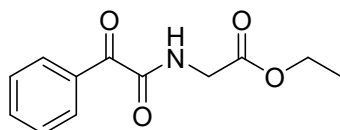

##### ethyl (2-oxo-2-phenylacetyl)glycinate

Compound **3a** was obtained in 78% yield (36.7 mg) according to the general procedure (petroleum ether/EtOAc, 10:1). Yellow oil. <sup>1</sup>H NMR (CDCl<sub>3</sub>, 500 MHz, ppm): δ 8.32 (d, *J* = 8.3 Hz, 2H), 7.64 - 7.60 (m, 2H), 7.48 (t, *J* = 7.7 Hz, 2H), 4.26 (q, *J* = 7.1 Hz, 2H), 4.17 (d, *J* = 5.6 Hz, 2H), 1.31 (t, *J* = 7.2 Hz, 3H); <sup>13</sup>C{<sup>1</sup>H} NMR (CDCl<sub>3</sub>, 125 MHz, ppm): δ 186.9, 169.0, 161.9, 134.5, 133.1, 131.2, 128.5, 61.8, 41.2, 14.1; MS (ESI) *m/z*: [M + H]<sup>+</sup> Calcd for C<sub>12</sub>H<sub>14</sub>NO<sub>4</sub> 236.0923; found 236.0856.

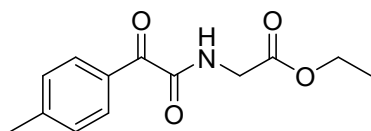

##### ethyl (2-oxo-2-(p-tolyl)acetyl)glycinate

Compound **3b** was obtained in 71% yield (35.4 mg) according to the general procedure (petroleum ether/EtOAc, 5:1). Yellow solid. mp = 80.7 - 81.2 °C; <sup>1</sup>H NMR (CDCl<sub>3</sub>, 500 MHz, ppm): δ 8.25 (d, *J* = 8.3 Hz, 2H), 7.56 (s, 1H), 7.28 (d, *J* = 8.3 Hz, 2H), 4.26 (q, *J* = 7.1 Hz, 2H), 4.16 (d, *J* = 5.6 Hz, 2H), 2.42 (s, 3H), 1.31 (t, *J* = 7.1 Hz, 3H); <sup>13</sup>C{<sup>1</sup>H} NMR (CDCl<sub>3</sub>, 125 MHz, ppm): δ 186.4, 169.0, 162.1, 145.8, 131.4, 130.7, 129.3, 61.8,

41.2, 21.9, 14.2; MS (ESI)  $m/z$ :  $[M + H]^+$  Calcd for  $C_{13}H_{16}NO_4$  250.1079; found 250.0975.

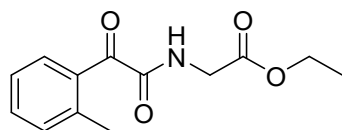

**ethyl (2-oxo-2-(o-tolyl)acetyl)glycinate**

Compound **3c** was obtained in 64% yield (31.9 mg) according to the general procedure (petroleum ether/EtOAc, 5:1). Yellow oil.  $^1H$  NMR ( $CDCl_3$ , 500 MHz, ppm):  $\delta$  7.93 - 7.91 (m, 1H), 7.54 (s, 1H), 7.45 (t,  $J = 7.5$  Hz, 1H), 7.30 - 7.27 (m, 2H), 4.26 (q,  $J = 7.1$  Hz, 2H), 4.16 (d,  $J = 5.6$  Hz, 2H), 2.51 (s, 3H), 1.31 (t,  $J = 7.1$  Hz, 3H);  $^{13}C\{^1H\}$  NMR ( $CDCl_3$ , 125 MHz, ppm):  $\delta$  190.4, 169.0, 162.3, 140.3, 132.9, 132.5, 132.1, 131.7, 125.4, 61.8, 41.4, 20.9, 14.2; MS (ESI)  $m/z$ :  $[M + H]^+$  Calcd for  $C_{13}H_{16}NO_4$  250.1079; found 250.1020.

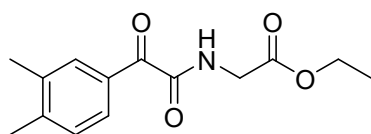

**ethyl (2-(3,4-dimethylphenyl)-2-oxoacetyl)glycinate**

Compound **3d** was obtained in 76% yield (39.8 mg) according to the general procedure (petroleum ether/EtOAc, 10:1). Yellow oil.  $^1H$  NMR ( $CDCl_3$ , 500 MHz, ppm):  $\delta$  8.10 - 8.08 (m, 2H), 7.56 (s, 1H), 7.23 (d,  $J = 8.4$  Hz, 1H), 4.26 (q,  $J = 7.2$  Hz, 2H), 4.16 (d,  $J = 5.6$  Hz, 2H), 2.33 (s, 3H), 2.31 (s, 3H), 1.31 (t,  $J = 7.2$  Hz, 3H);  $^{13}C\{^1H\}$  NMR ( $CDCl_3$ , 125 MHz, ppm):  $\delta$  186.7, 169.0, 162.3, 144.6, 137.0, 132.0, 131.0, 129.9, 129.1, 61.8, 41.2, 20.3, 19.7, 14.2; MS (ESI)  $m/z$ :  $[M + H]^+$  Calcd for  $C_{13}H_{16}NO_5$  264.1236; found 264.1185.

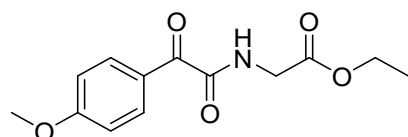

**ethyl (2-(4-methoxyphenyl)-2-oxoacetyl)glycinate**

Compound **3e** was obtained in 75% yield (39.7 mg) according to the general procedure (petroleum ether/EtOAc, 5:1). Yellow solid. mp = 99.7 - 100.2  $^{\circ}C$ ;  $^1H$  NMR ( $CDCl_3$ , 500 MHz, ppm):  $\delta$  8.39 (d,  $J = 8.8$  Hz, 2H), 7.61 (s, 1H), 6.95 (d,  $J = 8.8$  Hz, 2H), 4.26

(q,  $J = 7.1$  Hz, 2H), 4.15 (d,  $J = 5.6$  Hz, 2H), 3.88 (s, 3H), 1.31 (t,  $J = 7.1$  Hz, 3H);  $^{13}\text{C}\{^1\text{H}\}$  NMR ( $\text{CDCl}_3$ , 125 MHz, ppm):  $\delta$  184.9, 169.0, 164.8, 162.5, 133.9, 126.2, 113.9, 61.7, 55.6, 41.2, 14.1; MS (ESI)  $m/z$ :  $[\text{M} + \text{H}]^+$  Calcd for  $\text{C}_{12}\text{H}_{14}\text{NO}_4$  266.1028; found 266.0972.

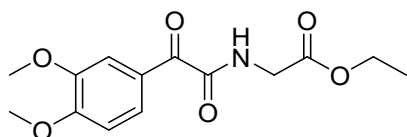

#### ethyl (2-(3,4-dimethoxyphenyl)-2-oxoacetyl)glycinate

Compound **3f** was obtained in 60% yield (35.4 mg) according to the general procedure (petroleum ether/EtOAc, 3:1). Yellow solid. mp = 81.5 - 81.9 °C;  $^1\text{H}$  NMR ( $\text{CDCl}_3$ , 500 MHz, ppm):  $\delta$  8.24 - 8.21 (m, 1H), 7.85 (d,  $J = 1.9$  Hz, 1H), 7.60 (s, 1H), 6.92 (d,  $J = 8.6$  Hz, 1H), 4.26 (q,  $J = 7.2$  Hz, 2H), 4.16 (d,  $J = 5.6$  Hz, 2H), 3.97 (s, 3H), 3.95 (s, 3H), 1.31 (t,  $J = 7.4$  Hz, 3H);  $^{13}\text{C}\{^1\text{H}\}$  NMR ( $\text{CDCl}_3$ , 125 MHz, ppm):  $\delta$  184.7, 169.0, 162.4, 154.8, 148.9, 127.4, 126.2, 112.5, 110.2, 61.8, 56.2, 56.0, 41.2, 14.2; MS (ESI)  $m/z$ :  $[\text{M} + \text{H}]^+$  Calcd for  $\text{C}_{14}\text{H}_{18}\text{NO}_6$  296.1134; found 296.1083.

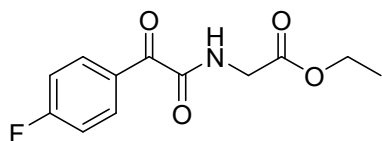

#### ethyl (2-(4-fluorophenyl)-2-oxoacetyl)glycinate

Compound **3g** was obtained in 66% yield (33.4 mg) according to the general procedure (petroleum ether/EtOAc, 10:1). Yellow oil.  $^1\text{H}$  NMR ( $\text{CDCl}_3$ , 500 MHz, ppm):  $\delta$  8.44 - 8.41 (m, 2H), 7.64 (s, 1H), 7.17 - 7.14 (m, 2H), 4.29 - 4.24 (m, 2H), 4.16 (d,  $J = 5.7$  Hz, 2H), 1.33 - 1.30 (m, 3H);  $^{13}\text{C}\{^1\text{H}\}$  NMR ( $\text{CDCl}_3$ , 125 MHz, ppm):  $\delta$  185.0, 168.9, 166.7 (d,  $J = 256.4$  Hz), 134.2 (d,  $J = 9.6$  Hz), 129.6 (d,  $J = 2.9$  Hz), 115.8 (d,  $J = 21.8$  Hz), 61.8, 41.2, 14.1;  $^{19}\text{F}$  NMR ( $\text{CDCl}_3$ , 500 MHz): -101.9; MS (ESI)  $m/z$ :  $[\text{M} + \text{H}]^+$  Calcd for  $\text{C}_{12}\text{H}_{13}\text{FNO}_4$  254.0829; found 254.0765.

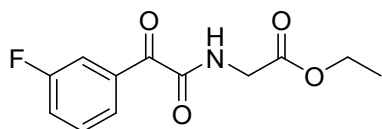

#### ethyl (2-(3-fluorophenyl)-2-oxoacetyl)glycinate

Compound **3h** was obtained in 62% yield (31.3 mg) according to the general procedure



(C/Pt, petroleum ether/EtOAc, 10:1). Yellow oil.  $^1\text{H}$  NMR ( $\text{CDCl}_3$ , 500 MHz, ppm):  $\delta$  8.17 (d,  $J = 7.8$  Hz, 1H), 8.06 - 8.04 (m, 1H), 7.59 (s, 1H), 7.49 - 7.45 (m, 1H), 7.36 - 7.32 (m, 1H), 4.27 (q,  $J = 7.2$  Hz, 2H), 4.17 (d,  $J = 5.6$  Hz, 2H), 1.32 (t,  $J = 7.2$  Hz, 3H);  $^{13}\text{C}\{^1\text{H}\}$  NMR ( $\text{CDCl}_3$ , 125 MHz, ppm):  $\delta$  185.5, 168.8, 162.4(d,  $J = 246.2$  Hz), 161.3, 134.9 (d,  $J = 7.0$  Hz), 130.2 (d,  $J = 7.5$  Hz), 127.1(d,  $J = 3.3$  Hz), 121.6 (d,  $J = 21.3$  Hz), 117.8 (d,  $J = 23.1$  Hz), 61.9, 41.3, 14.1;  $^{19}\text{F}$  NMR ( $\text{CDCl}_3$ , 500 MHz): -111.5; MS (ESI)  $m/z$ :  $[\text{M} + \text{H}]^+$  Calcd for  $\text{C}_{12}\text{H}_{13}\text{FNO}_4$  254.0829; found 254.0766.

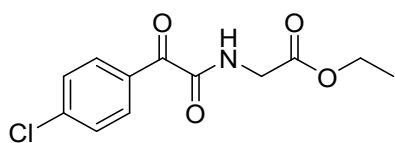

**ethyl (2-(4-chlorophenyl)-2-oxoacetyl)glycinate**

Compound **3i** was obtained in 70% yield (37.8 mg) according to the general procedure (petroleum ether/EtOAc, 10:1). Yellow solid. mp = 51.8 - 52.2 °C;  $^1\text{H}$  NMR ( $\text{CDCl}_3$ , 500 MHz, ppm):  $\delta$  8.34 - 8.30 (m, 2H), 7.60 (s, 1H), 7.47 - 7.43 (m, 2H), 4.26 (q,  $J = 7.1$  Hz, 2H), 4.16 (d,  $J = 5.6$  Hz, 2H), 1.31 (t,  $J = 7.1$  Hz, 3H);  $^{13}\text{C}\{^1\text{H}\}$  NMR ( $\text{CDCl}_3$ , 125 MHz, ppm):  $\delta$  185.4, 168.8, 161.5, 141.3, 132.7, 131.5, 128.9, 61.9, 41.2, 14.2; MS (ESI)  $m/z$ :  $[\text{M} + \text{H}]^+$  Calcd for  $\text{C}_{12}\text{H}_{13}\text{ClNO}_4$  270.0533; found 270.0475.

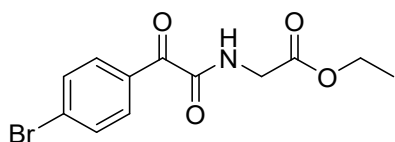

**ethyl (2-(4-bromophenyl)-2-oxoacetyl)glycinate**

Compound **3j** was obtained in 62% yield (28.3 mg) according to the general procedure (petroleum ether/EtOAc, 10:1). Yellow oil.  $^1\text{H}$  NMR ( $\text{CDCl}_3$ , 500 MHz, ppm):  $\delta$  8.23 (m,  $J = 8.6$  Hz, 2H), 7.64 - 7.62 (m, 3H), 4.26 (q,  $J = 7.2$  Hz, 2H), 4.15 (d,  $J = 5.6$  Hz, 2H), 1.31 (t,  $J = 7.2$  Hz, 3H);  $^{13}\text{C}\{^1\text{H}\}$  NMR ( $\text{CDCl}_3$ , 125 MHz, ppm):  $\delta$  185.7, 168.9, 161.4, 132.7, 131.9, 131.9, 130.3, 61.9, 41.2, 14.2; MS (ESI)  $m/z$ :  $[\text{M} + \text{H}]^+$  Calcd for  $\text{C}_{12}\text{H}_{13}\text{BrNO}_4$  314.0028; found 313.9967.

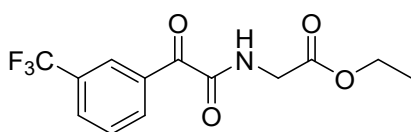

**ethyl (2-oxo-2-(3-(trifluoromethyl)phenyl)acetyl)glycinate**

Compound **3k** was obtained in 63% yield (38.1 mg) according to the general procedure (C/Pt, petroleum ether/EtOAc, 10:1). Yellow solid. mp = 50.8 - 51.0 °C; <sup>1</sup>H NMR (CDCl<sub>3</sub>, 500 MHz, ppm): δ 8.63 (s, 1H), 8.56 (d, *J* = 7.7 Hz, 1H), 7.88 (t, *J* = 7.8 Hz, 1H), 7.65 - 7.62 (m, 2H), 4.27 (q, *J* = 7.1 Hz, 2H), 4.18 (d, *J* = 5.6 Hz, 2H), 1.32 (t, *J* = 7.2 Hz, 3H); <sup>13</sup>C{<sup>1</sup>H} NMR (CDCl<sub>3</sub>, 125 MHz, ppm): δ 185.4, 168.8, 161.1, 134.4, 133.7, 131.2 (d, *J* = 33.0 Hz), 130.8 (q, *J* = 3.6 Hz), 129.2, 128.1 (q, *J* = 3.8 Hz), 123.5 (d, *J* = 270.9 Hz), 61.9, 41.3, 14.1; <sup>19</sup>F NMR (CDCl<sub>3</sub>, 500 MHz): -62.9; MS (ESI) *m/z*: [M + H]<sup>+</sup> Calcd for C<sub>13</sub>H<sub>13</sub>F<sub>3</sub>NO<sub>4</sub> 304.0797; found 304.0745.

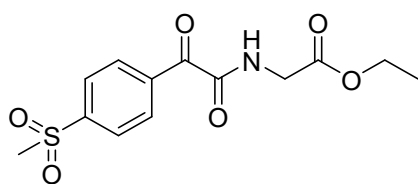

#### ethyl (2-(4-(methylsulfonyl)phenyl)-2-oxoacetyl)glycinate

Compound **3l** was obtained in 70% yield (43.7 mg) according to the general procedure (petroleum ether/EtOAc, 1:1). Yellow solid. mp = 112.1 - 112.5 °C; <sup>1</sup>H NMR (CDCl<sub>3</sub>, 500 MHz, ppm): δ 7.98 - 7.97 (m, 4H), 7.11 (s, 1H), 4.29 - 4.23 (m, 4H), 3.08 (s, 3H), 1.32 (t, *J* = 7.2 Hz, 3H); <sup>13</sup>C{<sup>1</sup>H} NMR (CDCl<sub>3</sub>, 125 MHz, ppm): δ 169.8, 165.9, 143.1, 138.7, 128.3, 127.7, 61.8, 44.3, 41.9, 14.2; MS (ESI) *m/z*: [M + H]<sup>+</sup> Calcd for C<sub>13</sub>H<sub>16</sub>NO<sub>6</sub>S 314.0698; found 314.0665.

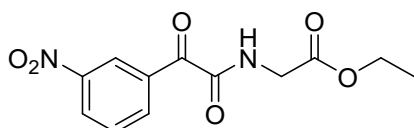

#### ethyl (2-(4-nitrophenyl)-2-oxoacetyl)glycinate

Compound **3m** was obtained in 41% yield (22.9 mg) according to the general procedure (petroleum ether/EtOAc, 10:1). Yellow solid. mp = 71.2 - 71.5 °C; <sup>1</sup>H NMR (CDCl<sub>3</sub>, 500 MHz, ppm): δ 9.19 - 9.18 (m, 1H), 8.71 - 8.69 (m, 1H), 8.49 - 8.47 (m, 1H), 7.72 - 7.69 (m, 2H), 4.28 (q, *J* = 7.2 Hz, 2H), 4.19 (d, *J* = 5.7 Hz, 2H), 1.33 (t, *J* = 7.2 Hz, 3H); <sup>13</sup>C{<sup>1</sup>H} NMR (CDCl<sub>3</sub>, 125 MHz, ppm): δ 184.6, 168.7, 160.7, 148.2, 136.8, 134.3, 129.8, 128.5, 126.1, 62.0, 41.3, 14.1; MS (ESI) *m/z*: [M + H]<sup>+</sup> Calcd for C<sub>12</sub>H<sub>13</sub>N<sub>2</sub>O<sub>6</sub> 281.0774; found 281.0709.

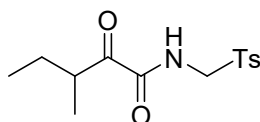

### 3-methyl-2-oxo-N-(tosylmethyl)pentanamide

Compound **3n** was obtained in 47% yield (27.8 mg) according to the general procedure (C/Pt, petroleum ether/EtOAc, 10:1). Yellow oil.  $^1\text{H}$  NMR ( $\text{CDCl}_3$ , 500 MHz, ppm):  $\delta$  7.76 (d,  $J$  = 8.2 Hz, 2H), 7.72 (s, 1H), 7.34 (d,  $J$  = 8.2 Hz, 2H), 4.74 - 4.64 (m, 2H), 3.25 - 3.18 (m, 1H), 2.43 (s, 3H), 1.62 - 1.53 (m, 1H), 1.33 - 1.25 (m, 1H), 0.98 (d,  $J$  = 7.0 Hz, 3H), 0.81 (t,  $J$  = 7.5 Hz, 3H);  $^{13}\text{C}\{^1\text{H}\}$  NMR ( $\text{CDCl}_3$ , 125 MHz, ppm):  $\delta$  200.3, 159.0, 145.7, 133.4, 130.0, 129.0, 60.0, 40.6, 25.2, 21.7, 14.8, 11.4; MS (ESI)  $m/z$ :  $[\text{M} + \text{H}]^+$  Calcd for  $\text{C}_{14}\text{H}_{20}\text{NO}_4\text{S}$  298.1113; found 298.1052.

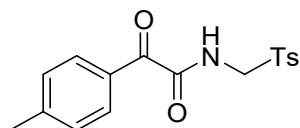

### 2-oxo-2-(p-tolyl)-N-(tosylmethyl)acetamide

Compound **3o** was obtained in 71% yield (47.1 mg) according to the general procedure (petroleum ether/EtOAc, 5:1). Yellow solid. mp = 96.9 - 97.0 °C;  $^1\text{H}$  NMR ( $\text{CDCl}_3$ , 500 MHz, ppm):  $\delta$  7.97 - 7.95 (m, 3H), 7.81 (d,  $J$  = 8.0 Hz, 2H), 7.32 (d,  $J$  = 7.8 Hz, 2H), 7.22 (d,  $J$  = 7.9 Hz, 2H), 4.78 (d,  $J$  = 7.0 Hz, 2H), 2.41 (d,  $J$  = 7.3 Hz, 6H);  $^{13}\text{C}\{^1\text{H}\}$  NMR ( $\text{CDCl}_3$ , 125 MHz, ppm):  $\delta$  185.6, 161.2, 146.3, 145.6, 133.5, 131.2, 130.1, 130.1, 129.3, 129.1, 60.1, 21.9, 21.7; MS (ESI)  $m/z$ :  $[\text{M} + \text{H}]^+$  Calcd for  $\text{C}_{17}\text{H}_{18}\text{NO}_4\text{S}$  332.0957; found 332.0903.

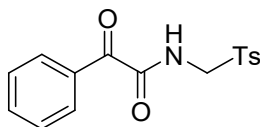

### 2-oxo-2-phenyl-N-(tosylmethyl)acetamide

Compound **3p** was obtained in 72% yield (45.5 mg) according to the general procedure (petroleum ether/EtOAc, 5:1). White solid. mp = 99.0 - 99.4 °C;  $^1\text{H}$  NMR ( $\text{CDCl}_3$ , 500 MHz, ppm):  $\delta$  7.99 - 7.97 (m, 2H), 7.81 (s, 1H), 7.74 (d,  $J$  = 8.3 Hz, 2H), 7.37 - 7.34 (m, 1H), 7.26 (d,  $J$  = 8.0 Hz, 2H), 4.71 (d,  $J$  = 7.0 Hz, 2H), 2.35 (s, 3H);  $^{13}\text{C}\{^1\text{H}\}$  NMR ( $\text{CDCl}_3$ , 125 MHz, ppm):  $\delta$  186.1, 160.8, 145.7, 134.9, 133.4, 132.5, 131.1, 130.1,

129.1, 128.6, 60.0, 21.7; MS (ESI)  $m/z$ :  $[M + H]^+$  Calcd for  $C_{16}H_{16}NO_4S$  318.0800; found 318.0744.

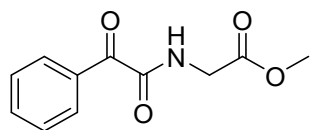

#### **methyl (2-oxo-2-phenylacetyl)glycinate**

Compound **3q** was obtained in 68% yield (30.1 mg) according to the general procedure (petroleum ether/EtOAc, 5:1). Yellow oil.  $^1H$  NMR ( $CDCl_3$ , 500 MHz, ppm):  $\delta$  8.34 - 8.33 (m, 2H), 7.64 (t,  $J$  = 7.5 Hz, 1H), 7.55 (s, 1H), 7.47 (t,  $J$  = 7.8 Hz, 2H), 4.19 (d,  $J$  = 5.6 Hz, 2H), 3.81 (s, 3H);  $^{13}C\{^1H\}$  NMR ( $CDCl_3$ , 125 MHz, ppm):  $\delta$  186.8, 169.4, 161.8, 134.6, 133.1, 131.2, 128.6, 52.6, 41.1; MS (ESI)  $m/z$ :  $[M + H]^+$  Calcd for  $C_{11}H_{12}NO_4$  222.0766; found 222.0694.

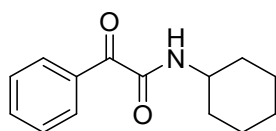

#### **N-cyclohexyl-2-oxo-2-phenylacetamide**

Compound **3r** was obtained in 55% yield (25.4 mg) according to the general procedure (C/Pt, petroleum ether/EtOAc, 10:1). Yellow solid. mp = 104.8 - 105.1 °C;  $^1H$  NMR ( $CDCl_3$ , 500 MHz, ppm):  $\delta$  8.33 (d,  $J$  = 8.2 Hz, 2H), 7.61 (t,  $J$  = 7.4 Hz, 1H), 7.47 (t,  $J$  = 7.7 Hz, 2H), 6.97 (s, 1H), 3.88 - 3.83 (m, 1H), 1.99 (d,  $J$  = 11.9 Hz, 2H), 1.78 - 1.75 (m, 2H), 1.67 - 1.64 (m, 1H), 1.45 - 1.38 (m, 2H), 1.31 - 1.19 (m, 3H);  $^{13}C\{^1H\}$  NMR ( $CDCl_3$ , 125 MHz, ppm):  $\delta$  188.1, 160.9, 134.3, 133.5, 131.2, 128.5, 48.5, 32.7, 25.4, 24.8; MS (ESI)  $m/z$ :  $[M + H]^+$  Calcd for  $C_{14}H_{18}NO_2$  232.1338; found 232.1286.

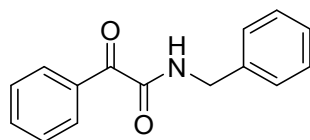

#### **N-benzyl-2-oxo-2-phenylacetamide**

Compound **3s** was obtained in 86% yield (41.2 mg) according to the general procedure (petroleum ether/EtOAc, 15:1). Yellow solid. mp = 95.2 - 95.6 °C;  $^1H$  NMR ( $CDCl_3$ , 500 MHz, ppm):  $\delta$  8.36 - 8.34 (m, 2H), 7.64 - 7.60 (m, 1H), 7.49 - 7.46 (m, 2H), 7.43 (s, 1H), 7.37 - 7.28 (m, 5H), 4.57 (d,  $J$  = 6.1 Hz, 2H);  $^{13}C\{^1H\}$  NMR ( $CDCl_3$ , 125 MHz,

ppm):  $\delta$  187.6, 161.6, 137.2, 134.5, 133.3, 131.3, 128.9, 128.5, 127.9, 127.9, 43.5; MS (ESI)  $m/z$ :  $[M + H]^+$  Calcd for  $C_{15}H_{14}NO_2$  240.1025; found 240.0951.

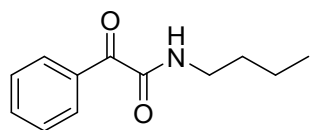

#### **N-butyl-2-oxo-2-phenylacetamide**

Compound **3u** was obtained in 71% yield (29.1 mg) according to the general procedure (petroleum ether/EtOAc, 15:1). Yellow oil.  $^1H$  NMR ( $CDCl_3$ , 500 MHz, ppm):  $\delta$  8.34 - 8.32 (m, 2H), 7.64 - 7.60 (m, 1H), 7.49 - 7.45 (m, 2H), 7.14 - 7.11 (m, 1H), 3.40 (q,  $J$  = 6.9 Hz, 2H), 1.63 - 1.56 (m, 2H), 1.46 - 1.36 (m, 2H), 0.96 (t,  $J$  = 7.3 Hz, 3H);  $^{13}C\{^1H\}$  NMR ( $CDCl_3$ , 125 MHz, ppm):  $\delta$  187.9, 161.8, 134.3, 133.4, 131.2, 128.5, 39.2, 31.3, 20.1, 13.7; MS (ESI)  $m/z$ :  $[M + H]^+$  Calcd for  $C_{12}H_{16}NO_2$  206.1181; found 206.1112.

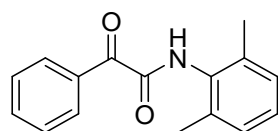

#### **N-(2,6-dimethylphenyl)-2-oxo-2-phenylacetamide**

Compound **3t** was obtained in 70% yield (35.4 mg) according to the general procedure (petroleum ether/EtOAc, 15:1). Yellow solid. mp = 111.0 - 111.3 °C;  $^1H$  NMR ( $CDCl_3$ , 500 MHz, ppm):  $\delta$  8.41 - 8.40 (m, 3H), 7.65 (t,  $J$  = 7.8 Hz, 1H), 7.50 (t,  $J$  = 7.8 Hz, 2H), 7.18 - 7.11 (m, 3H), 2.29 (s, 6H);  $^{13}C\{^1H\}$  NMR ( $CDCl_3$ , 125 MHz, ppm):  $\delta$  187.7, 159.9, 135.2, 134.7, 133.2, 132.5, 131.4, 128.7, 128.4, 127.8, 18.5; MS (ESI)  $m/z$ :  $[M + H]^+$  Calcd for  $C_{16}H_{16}NO_2$  254.1181; found 254.1123.

### **5. Copies of NMR Spectra for 3a–3u**

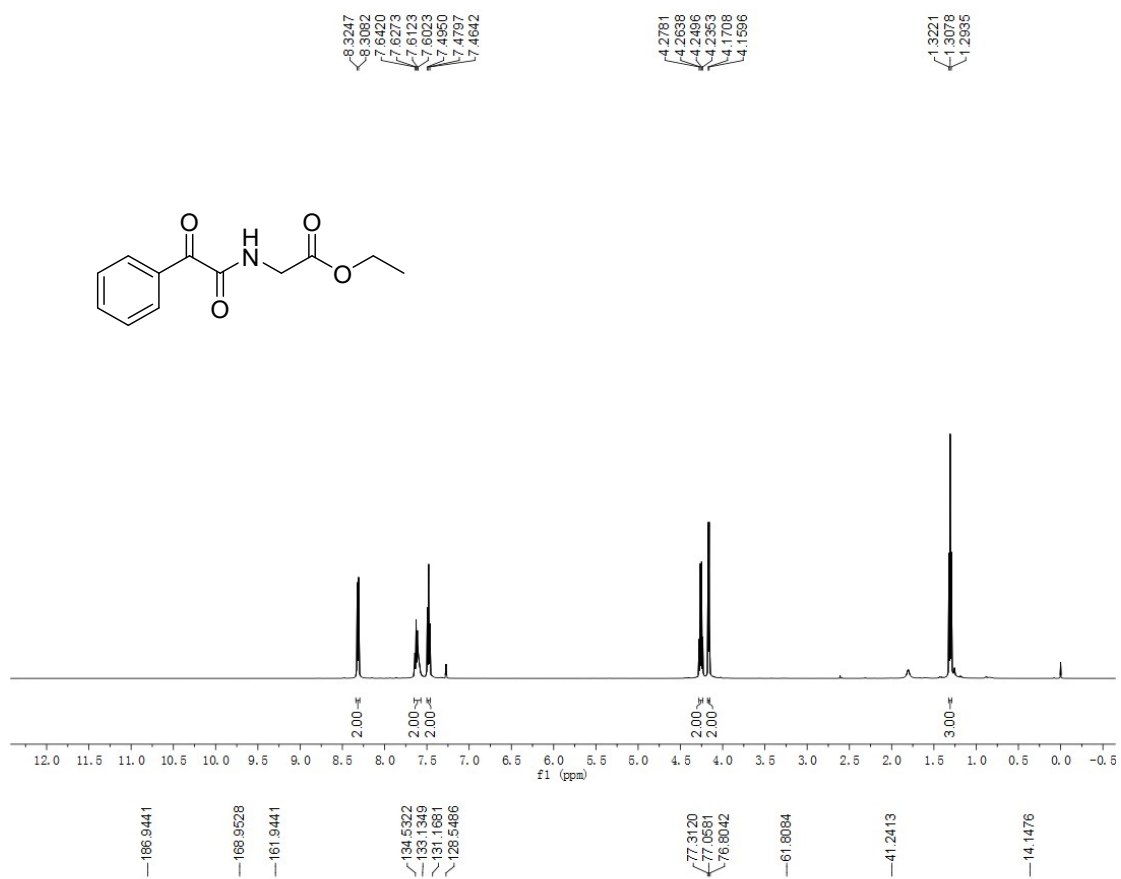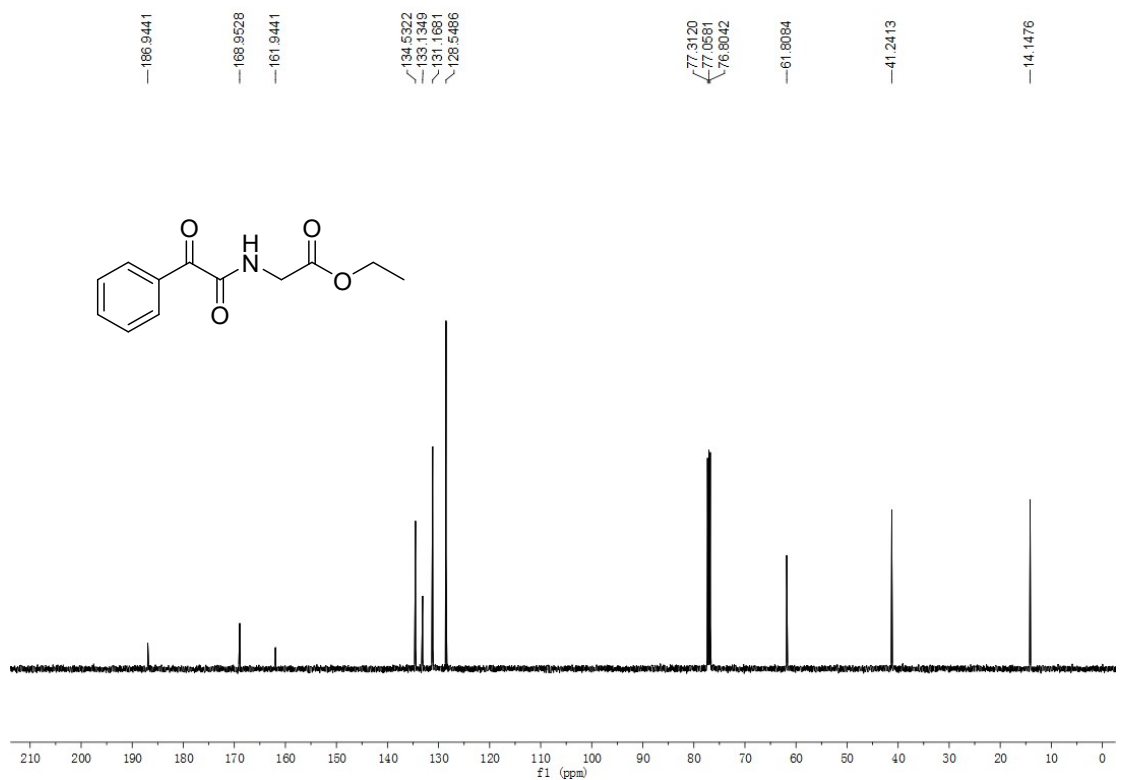

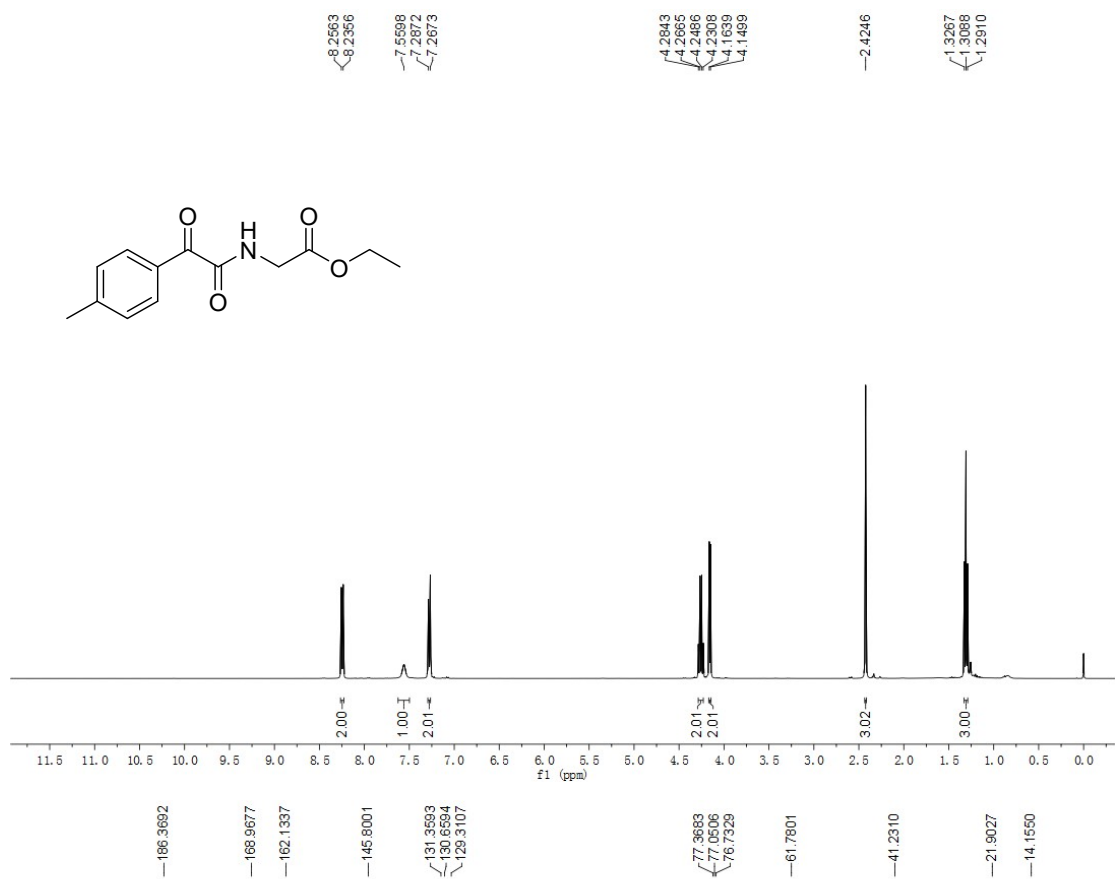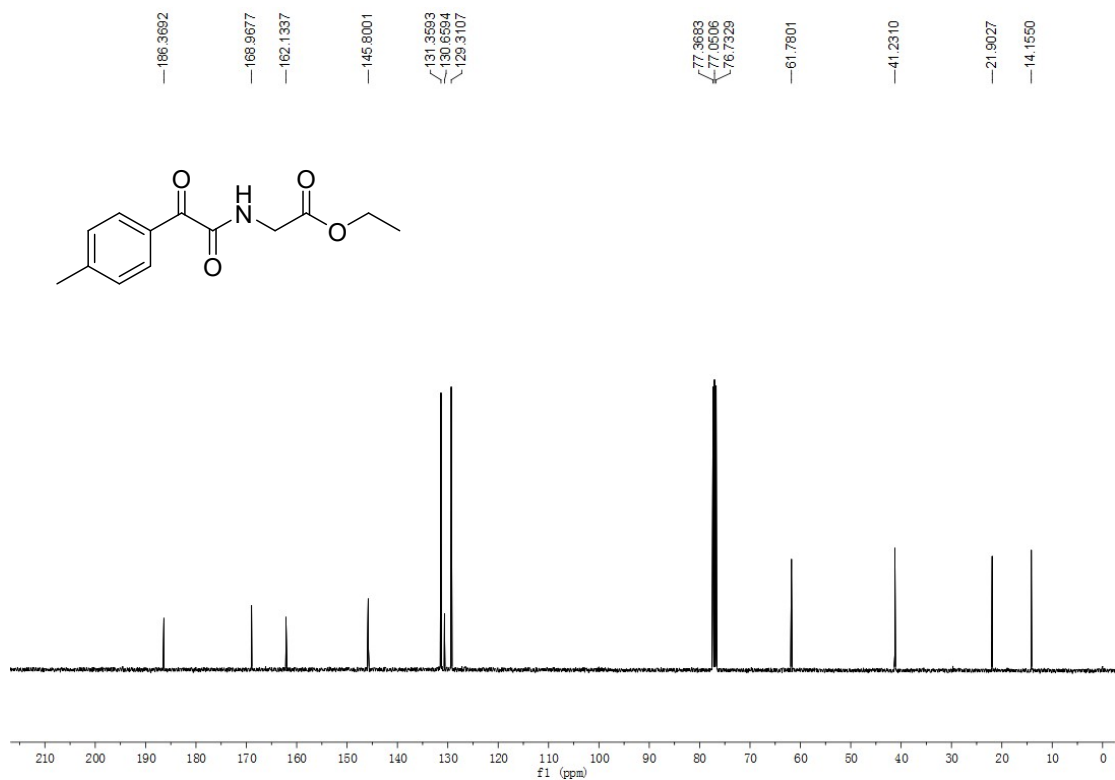

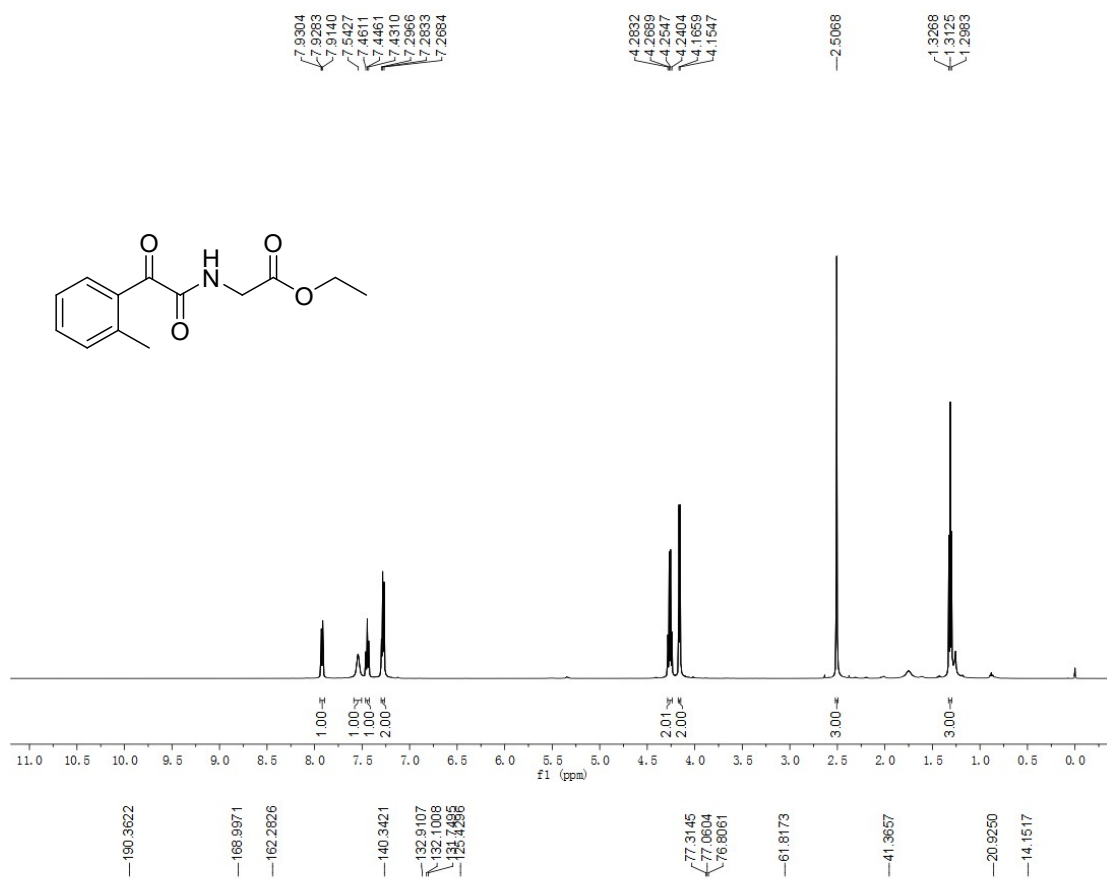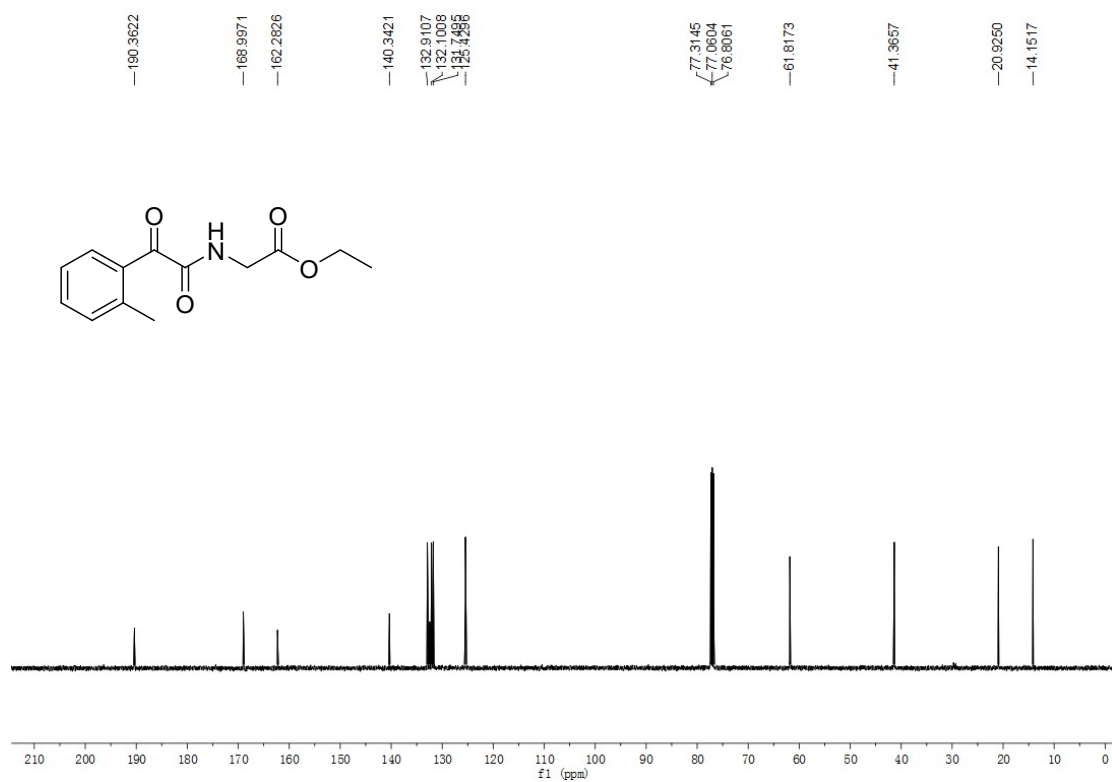



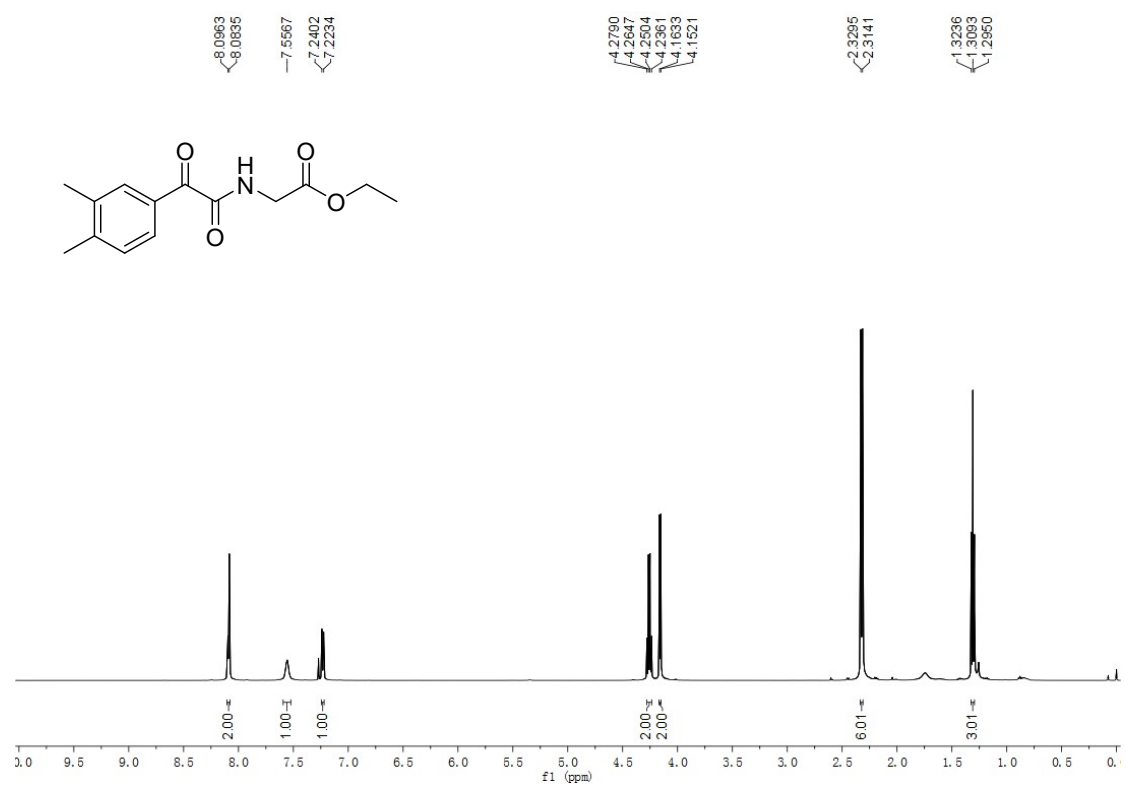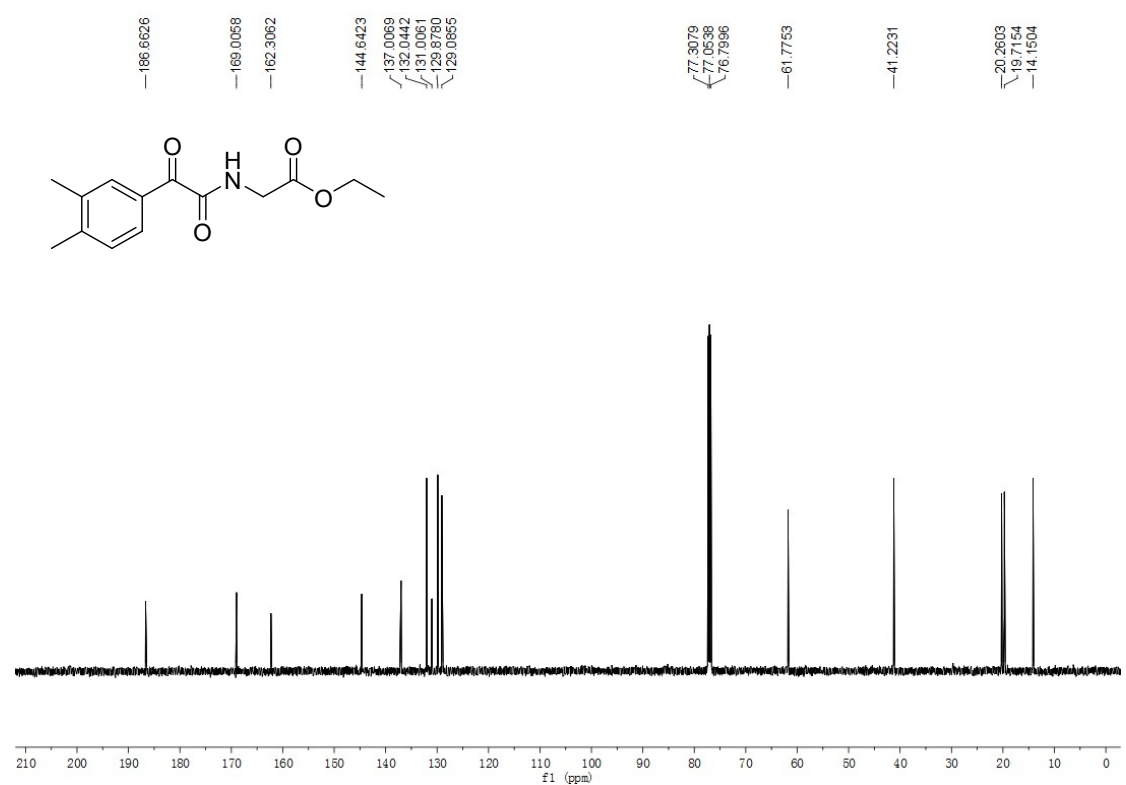

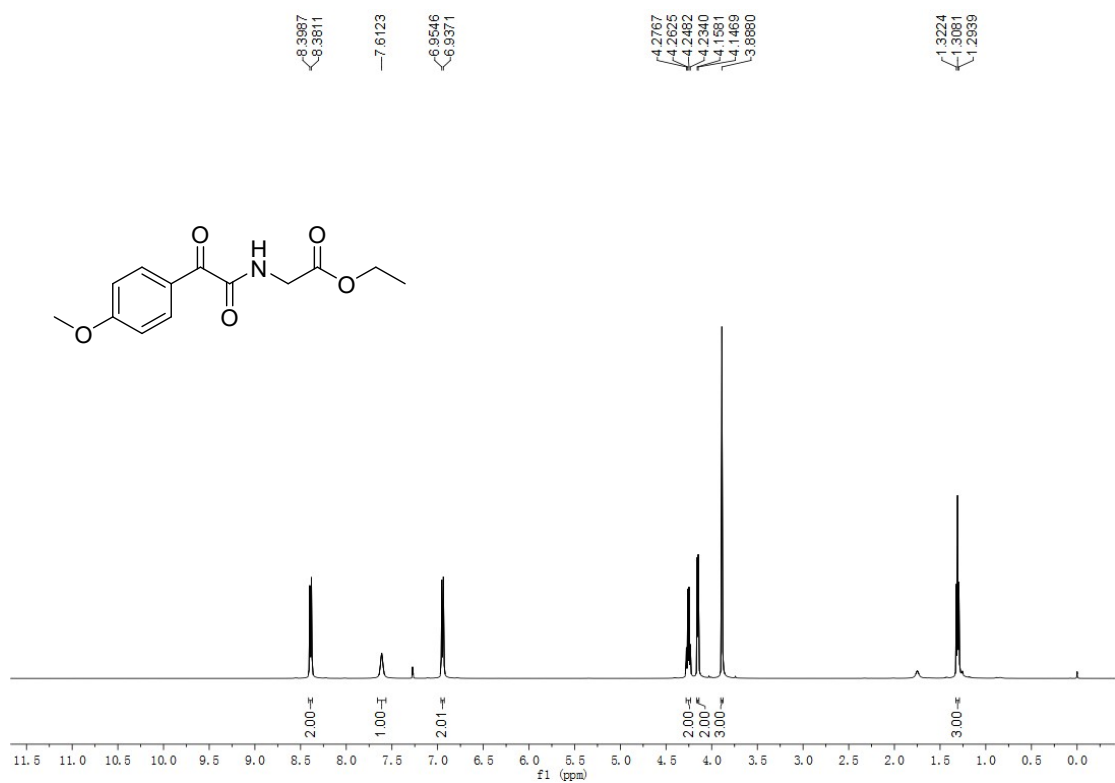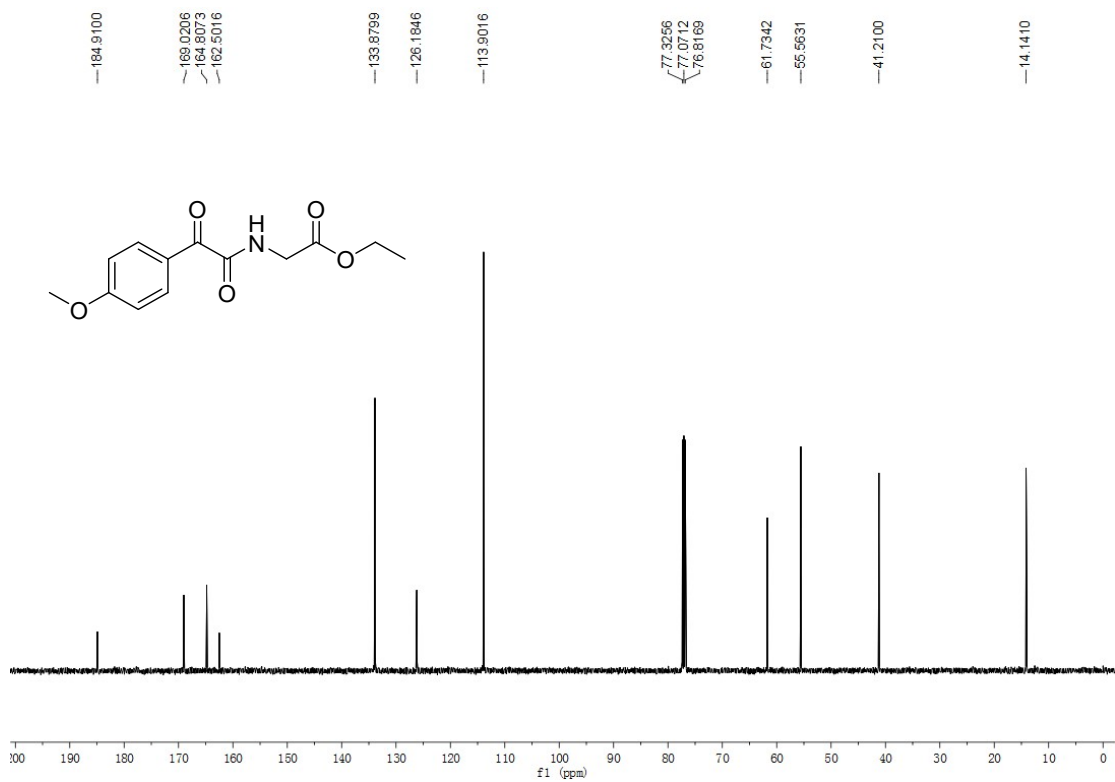

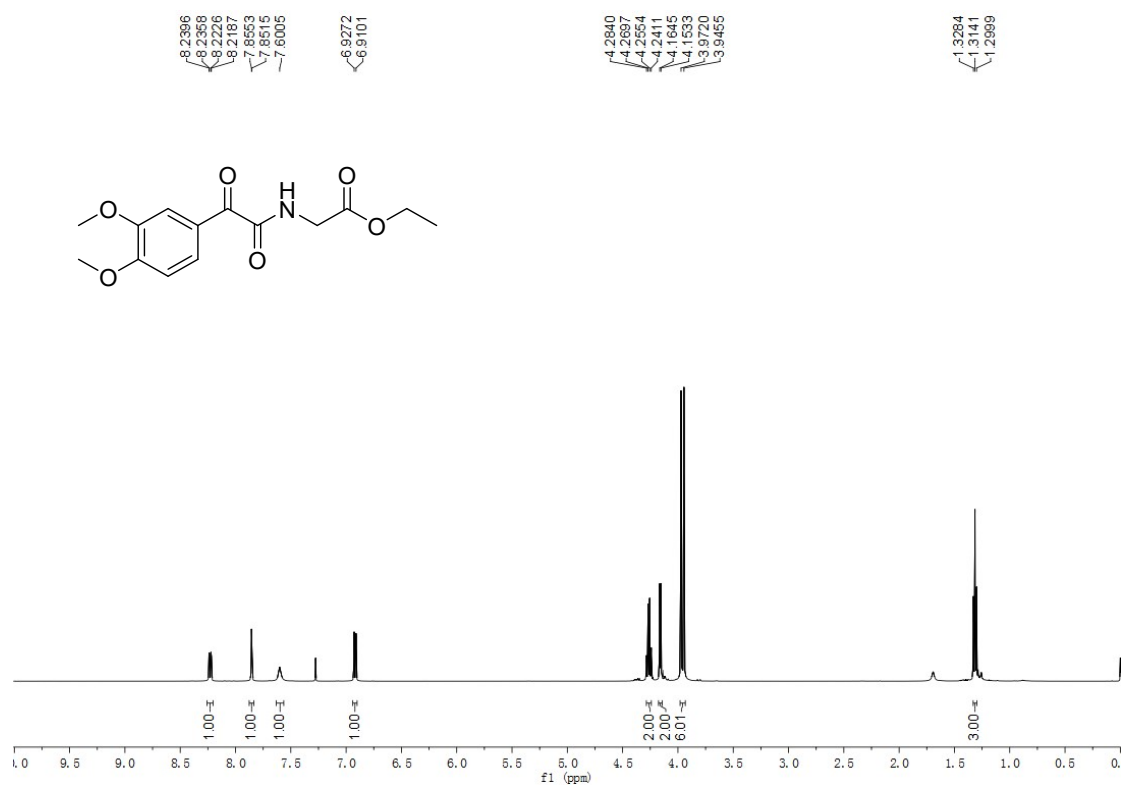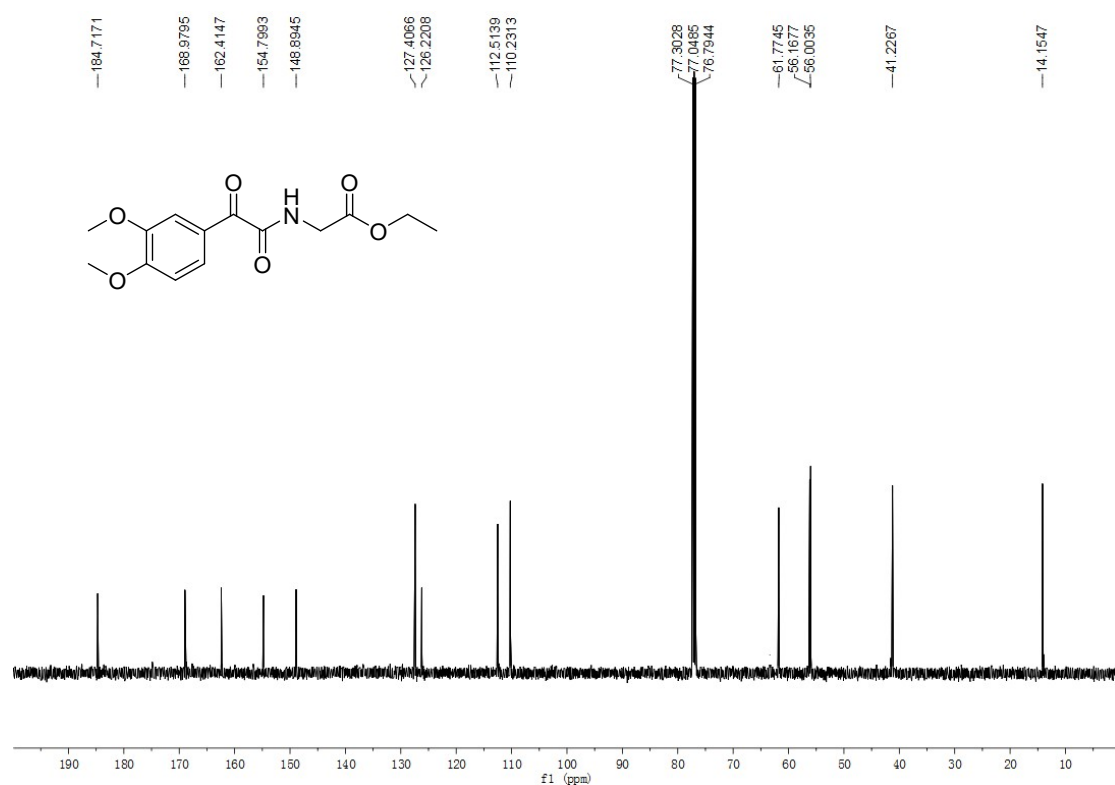

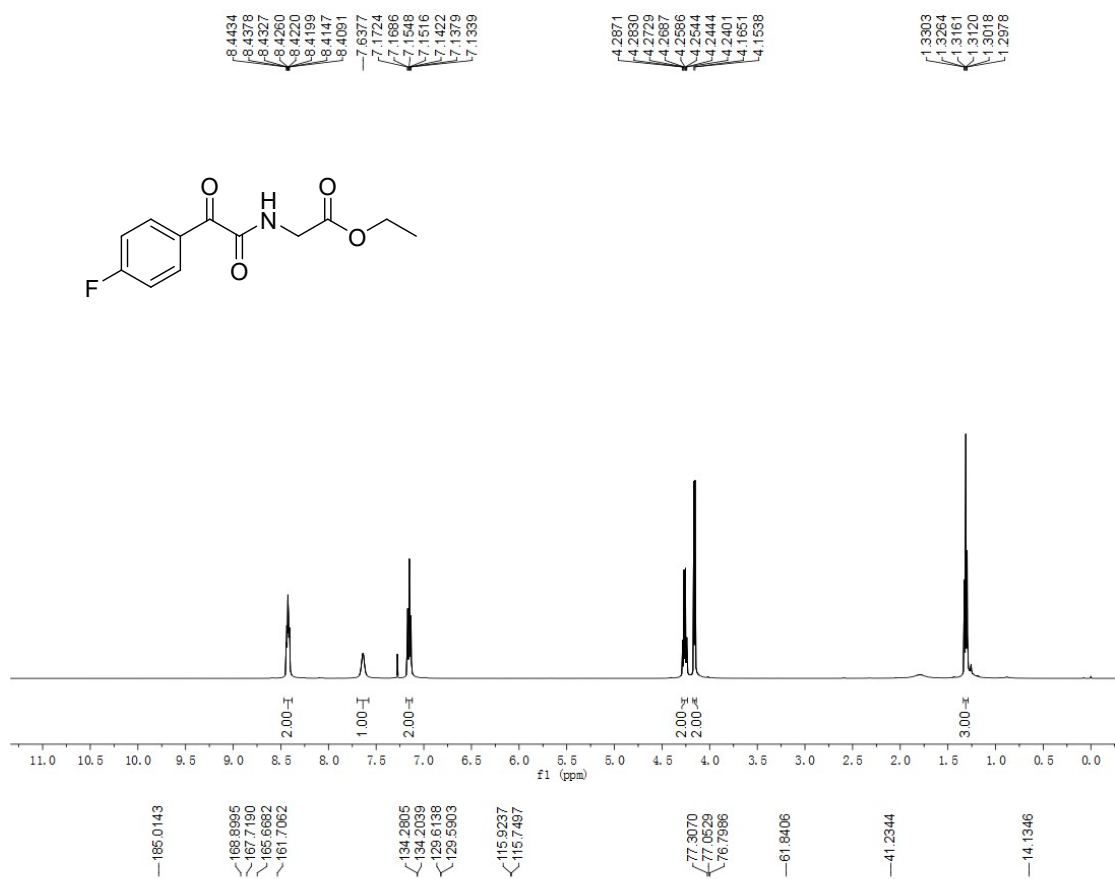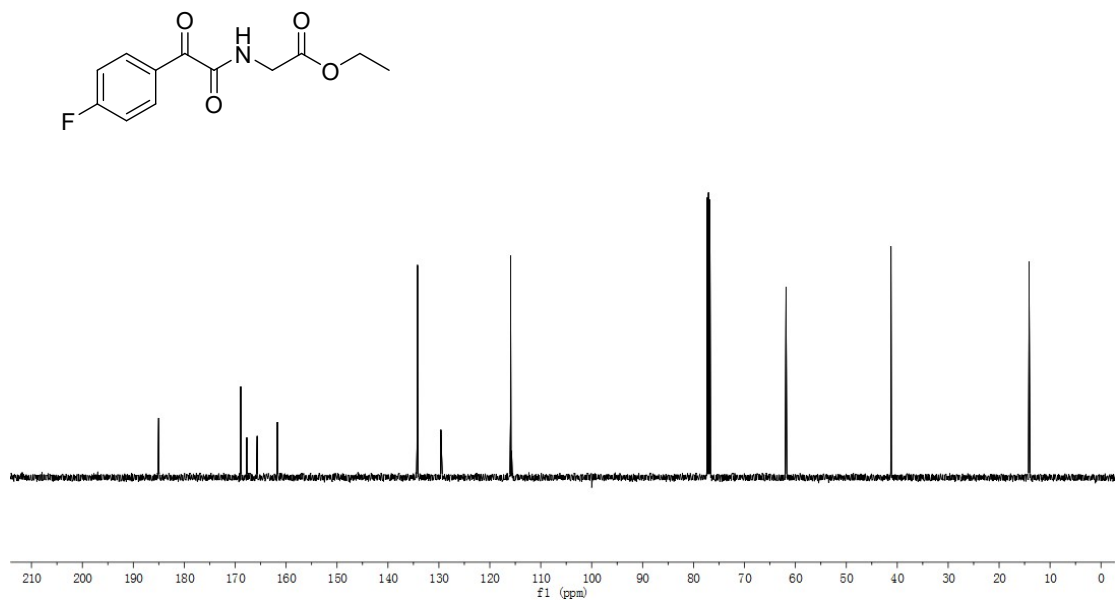

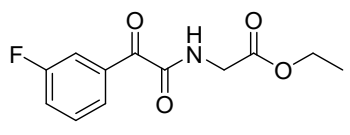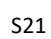

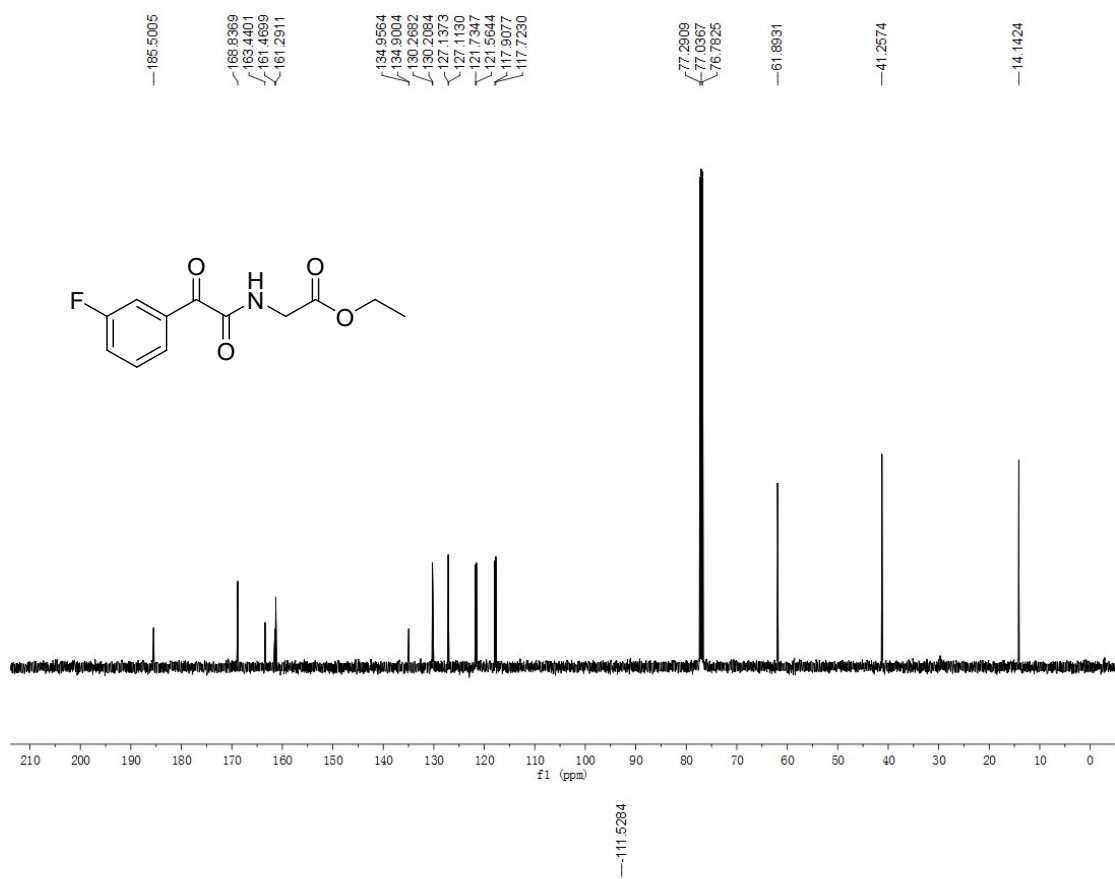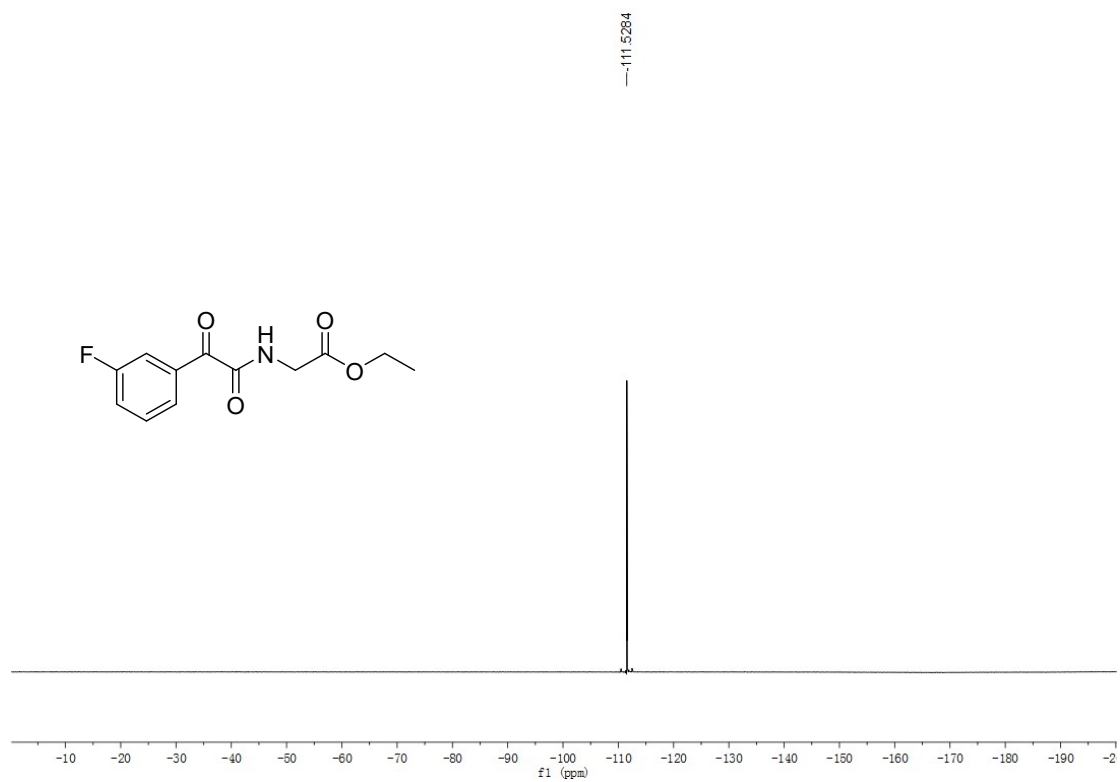

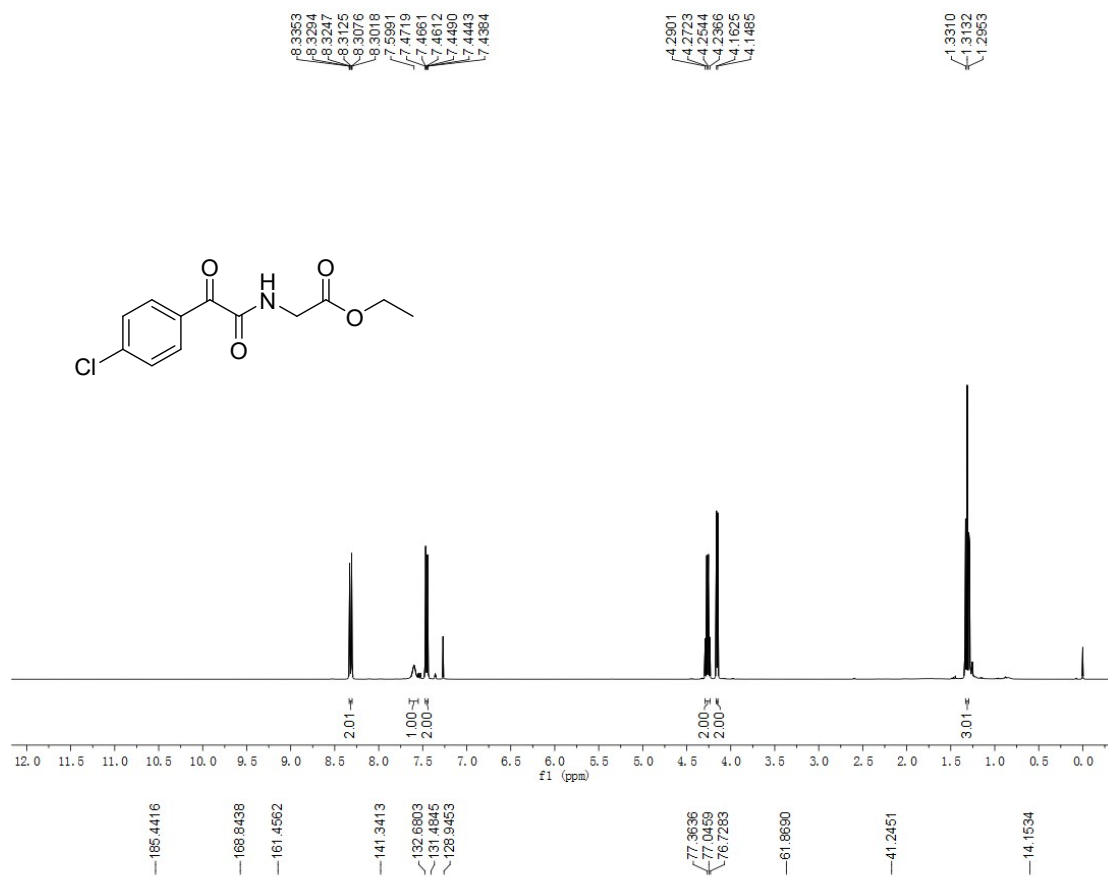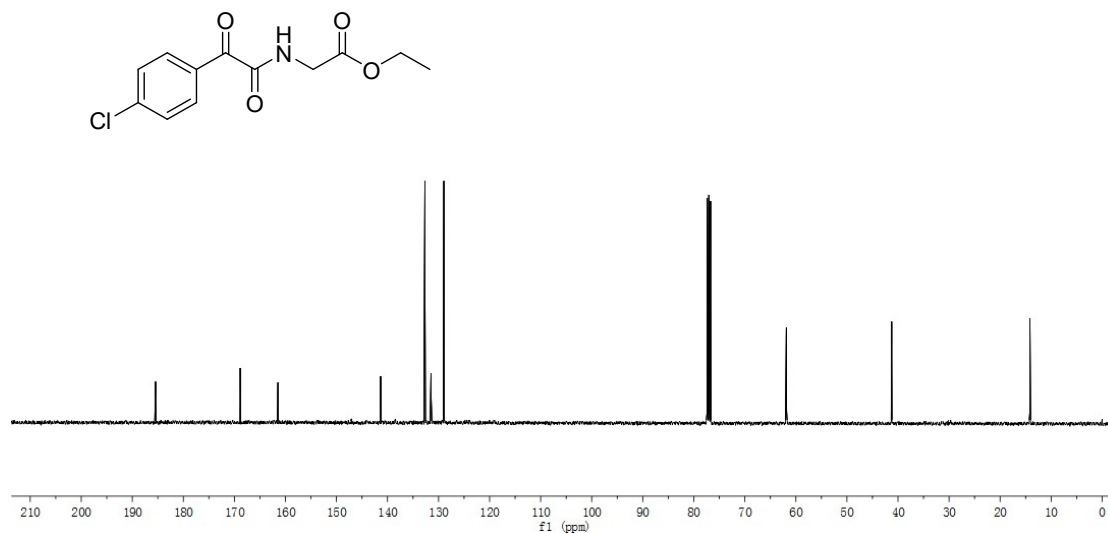

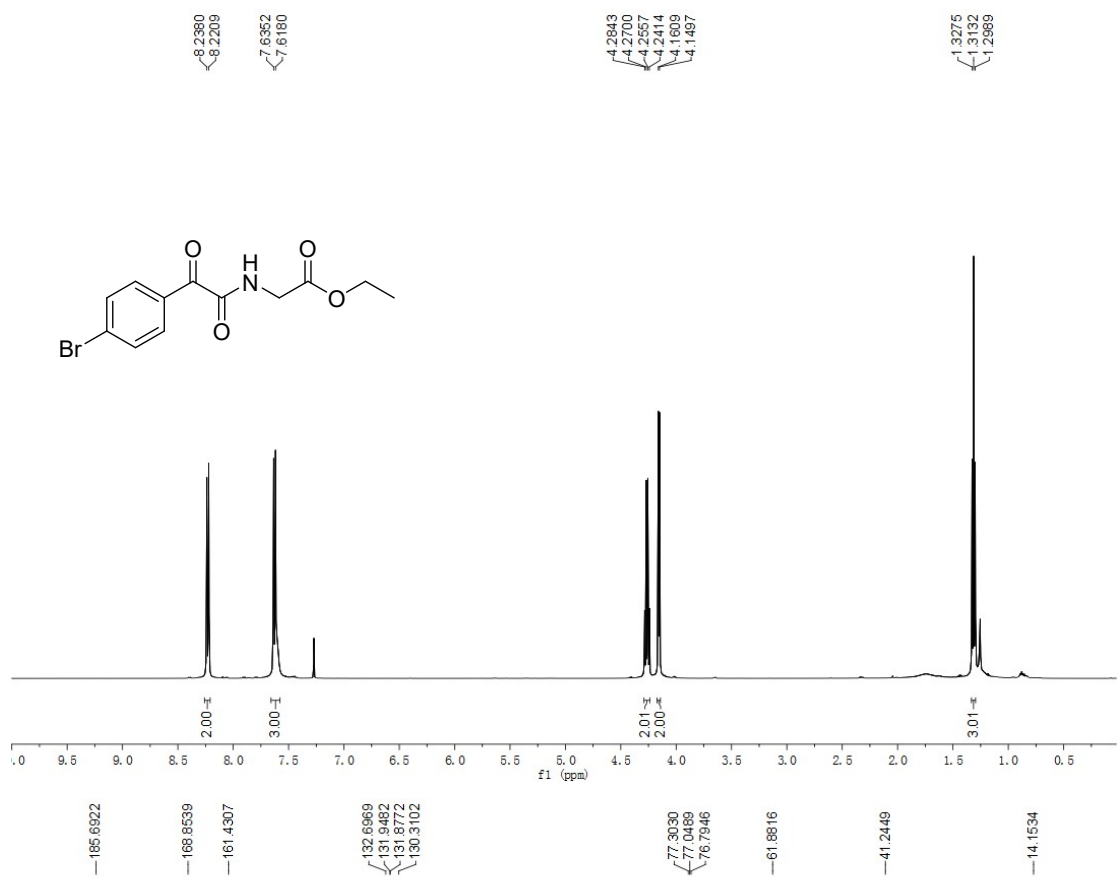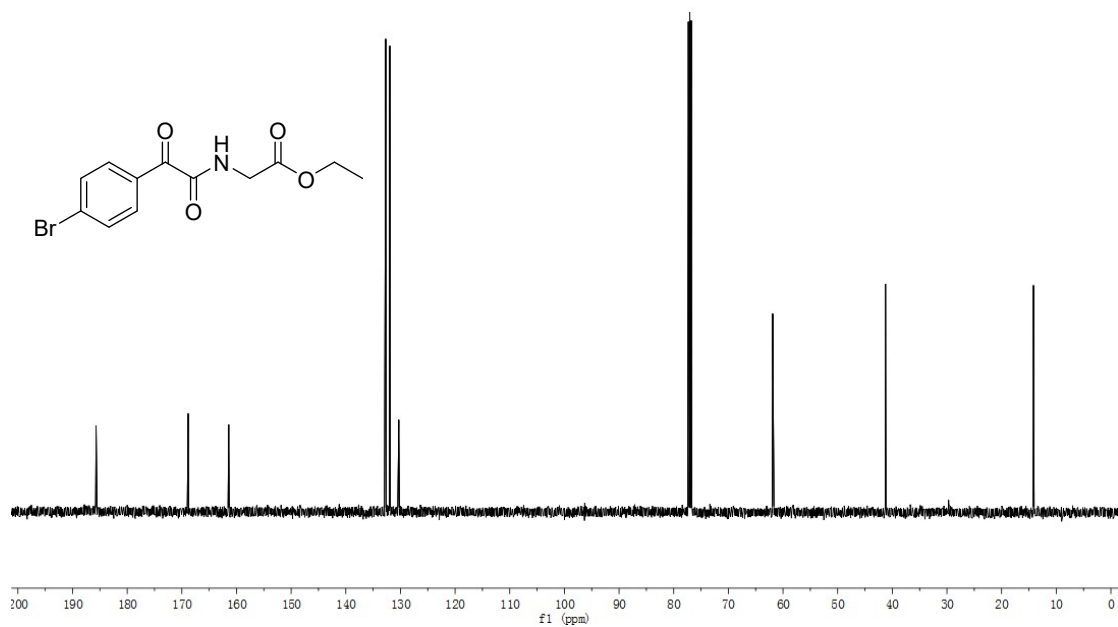



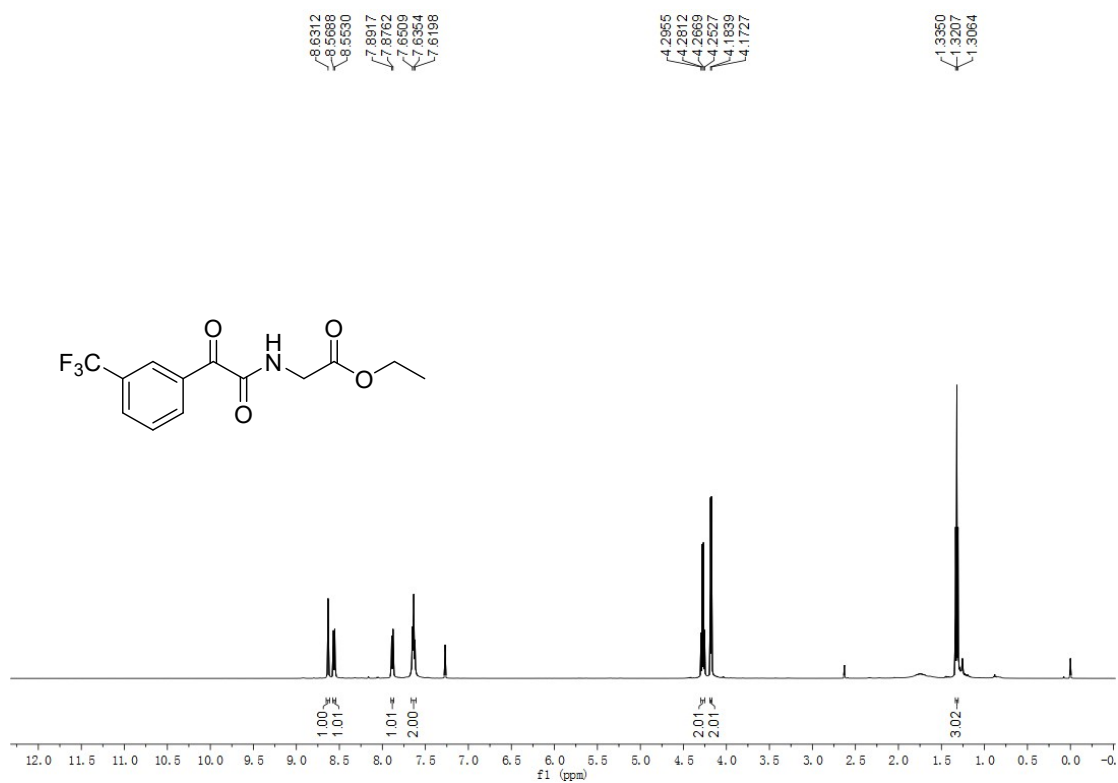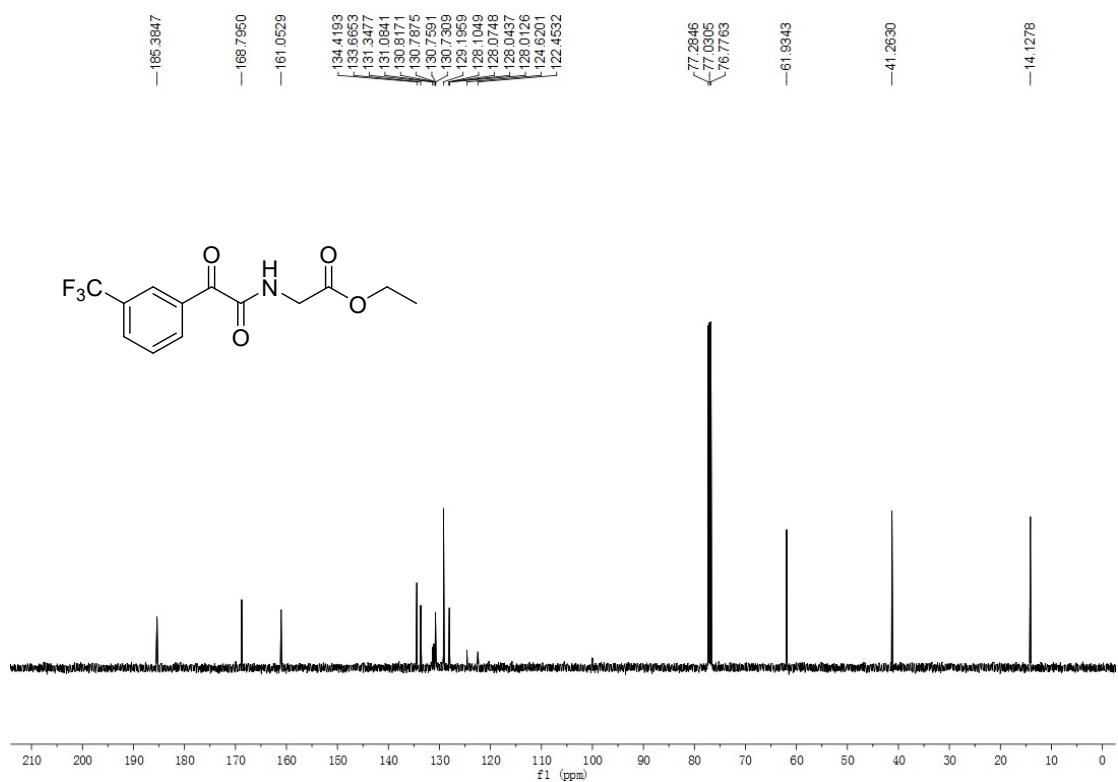

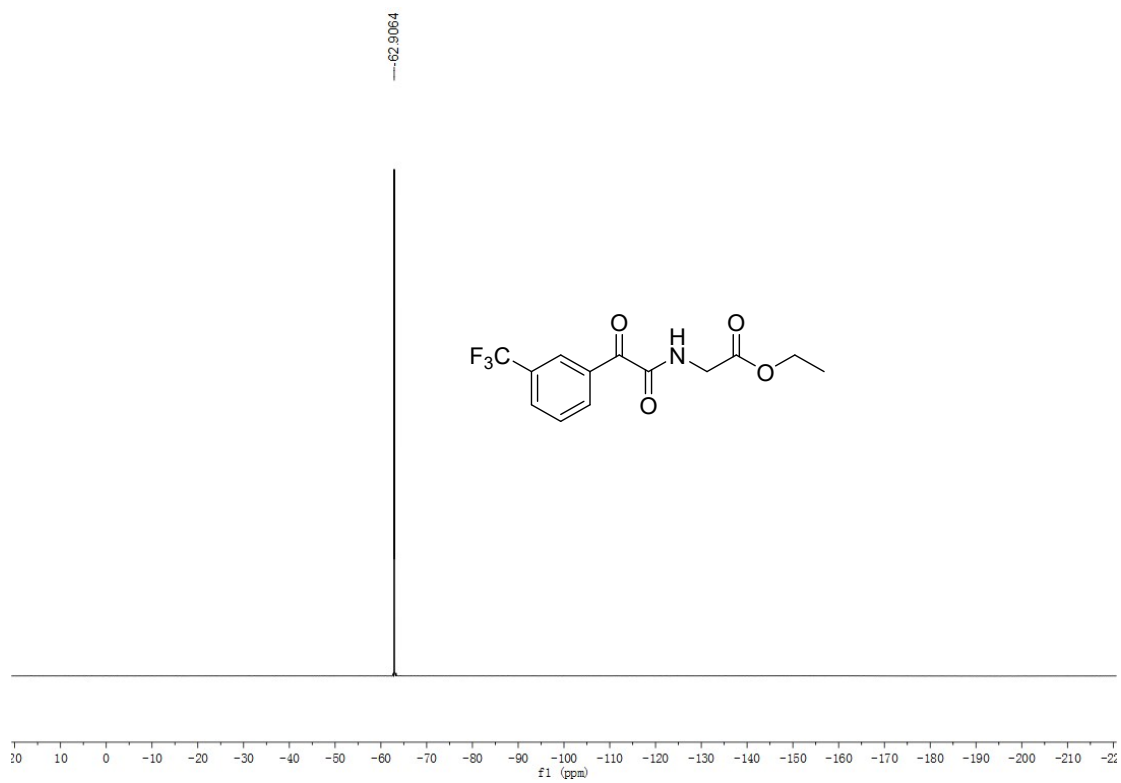

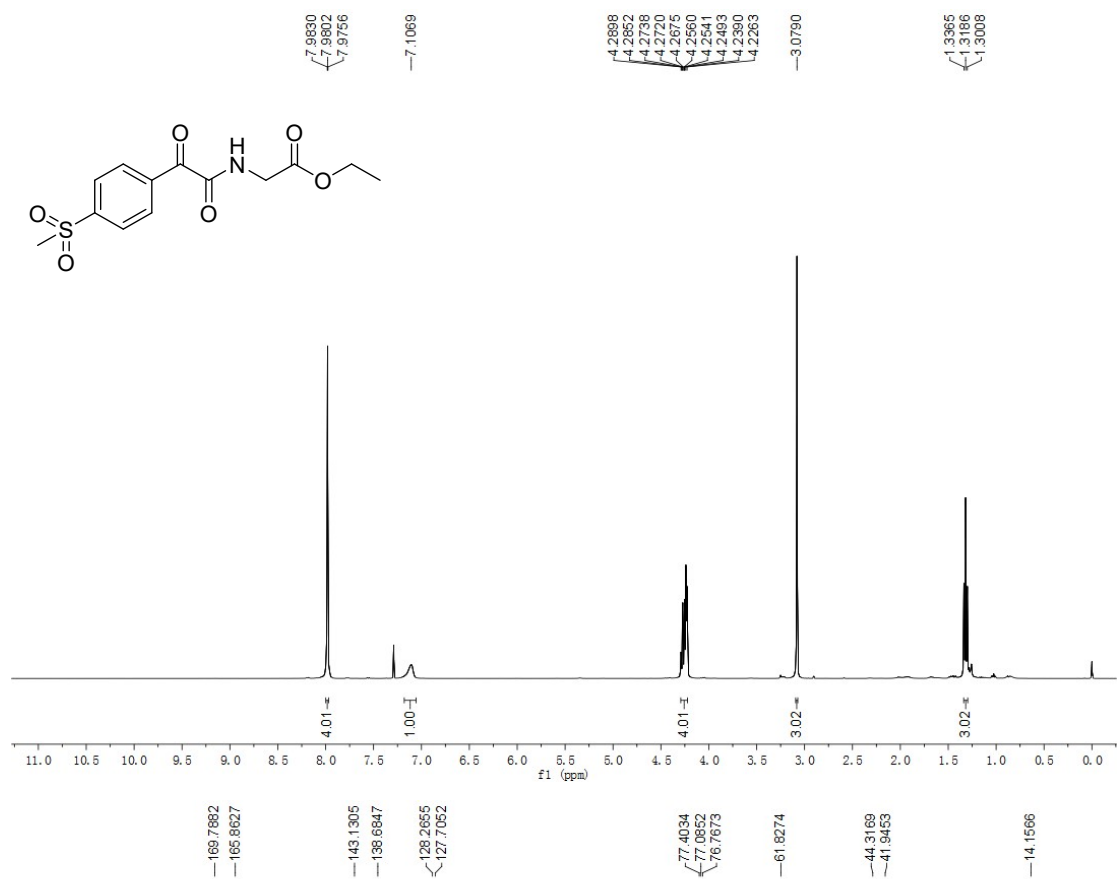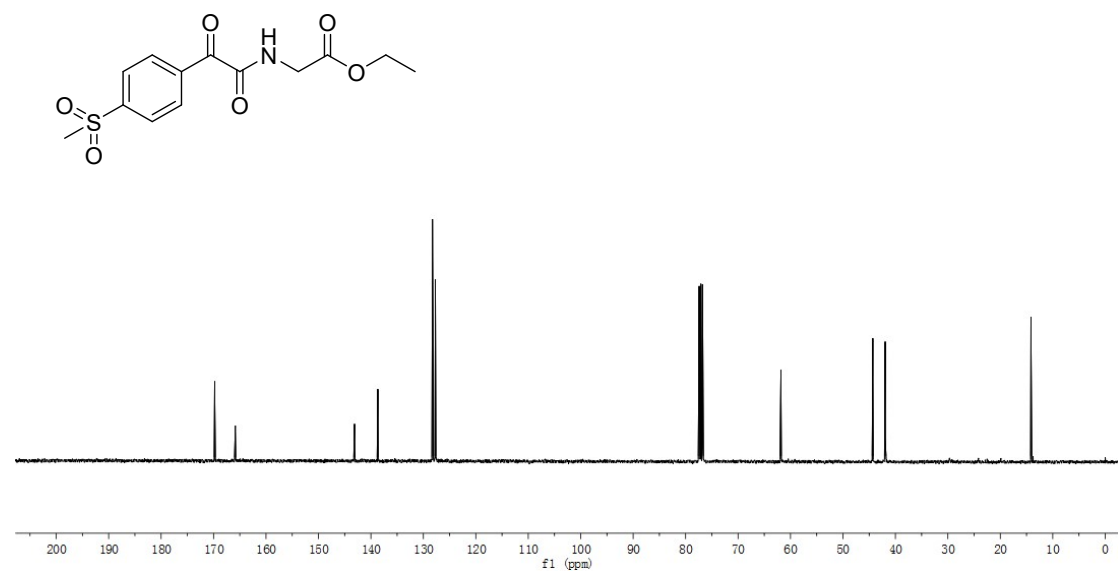

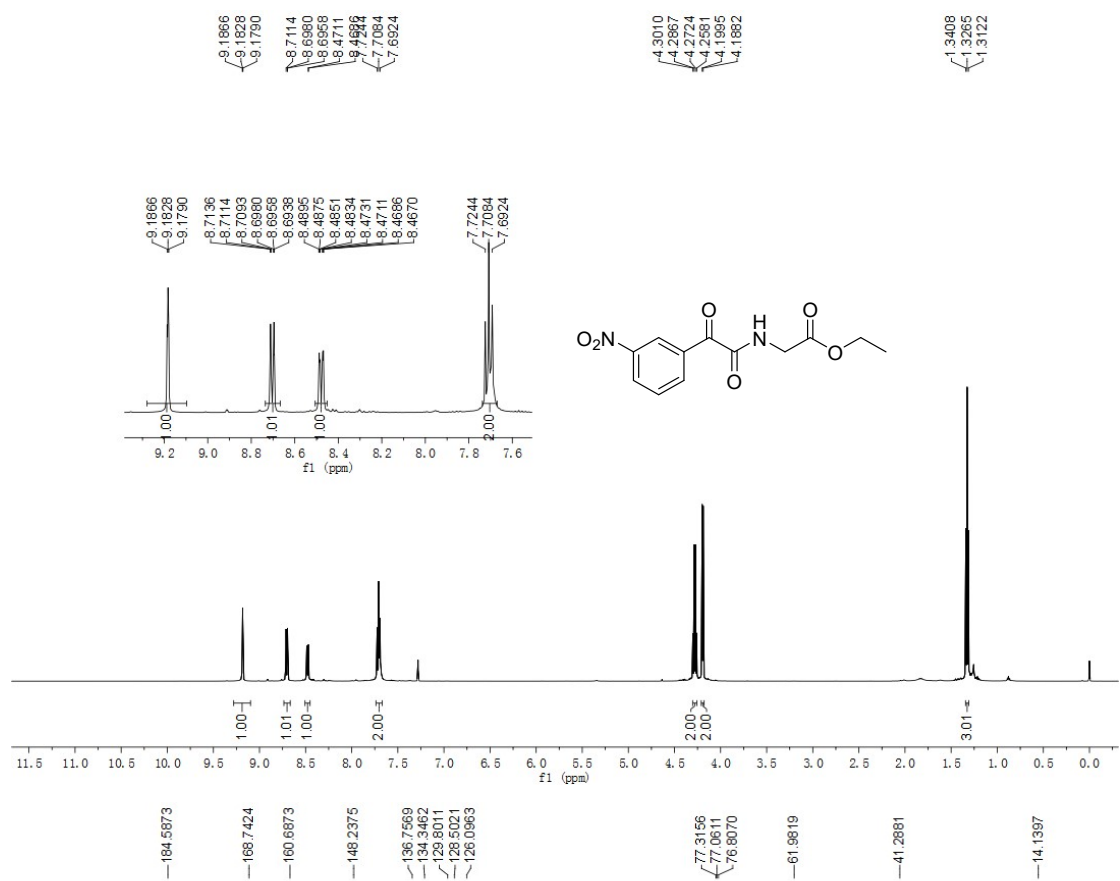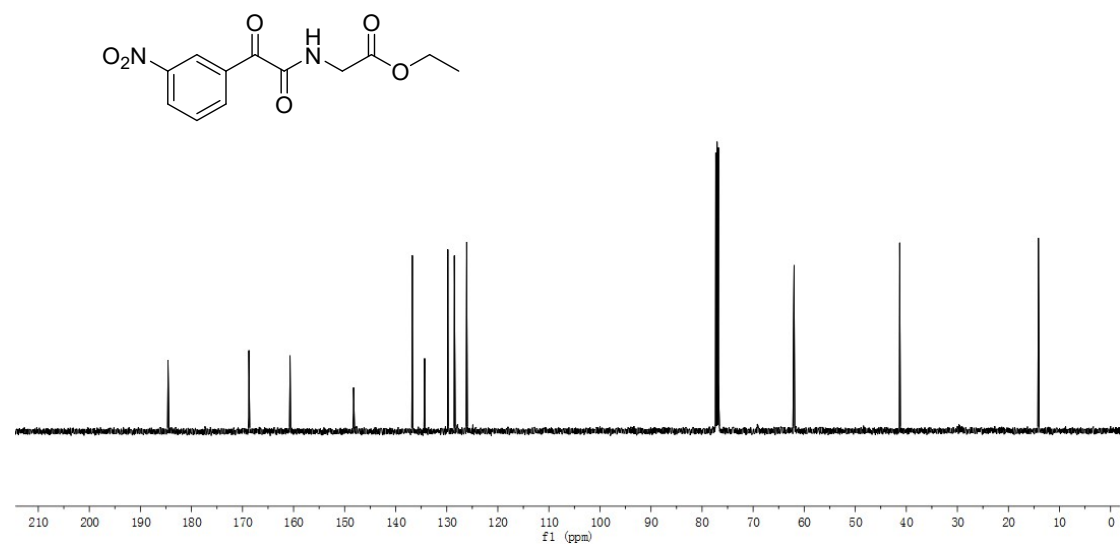

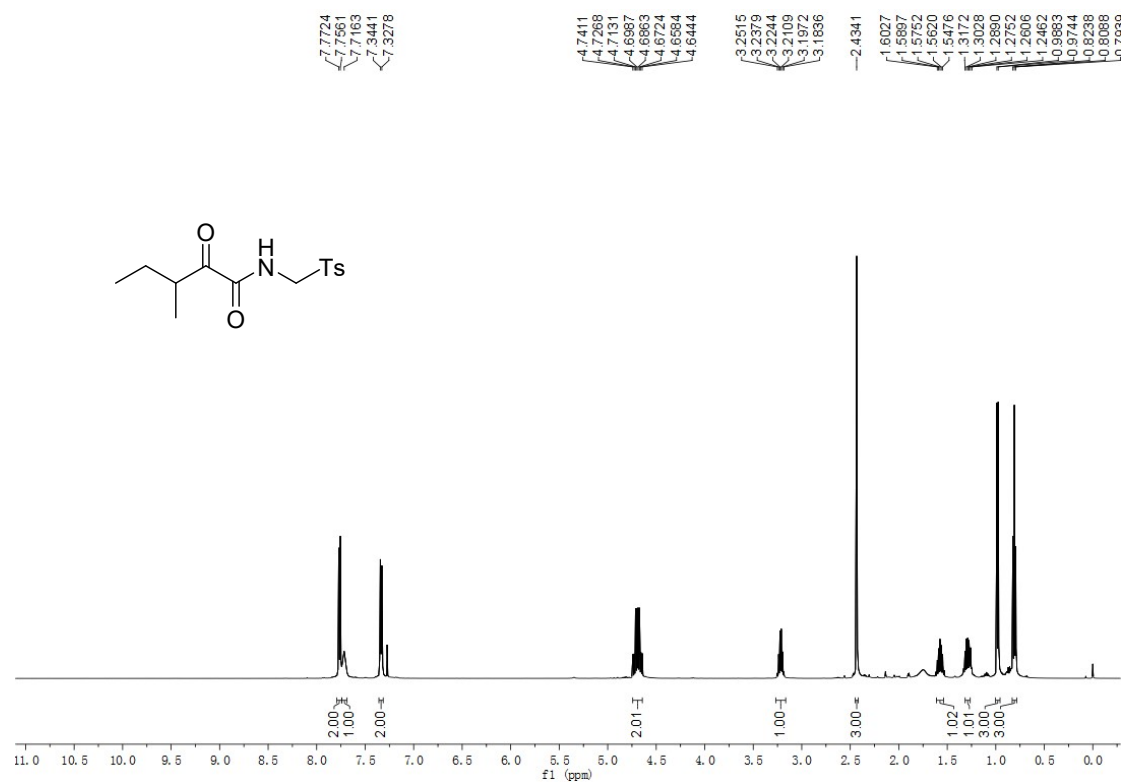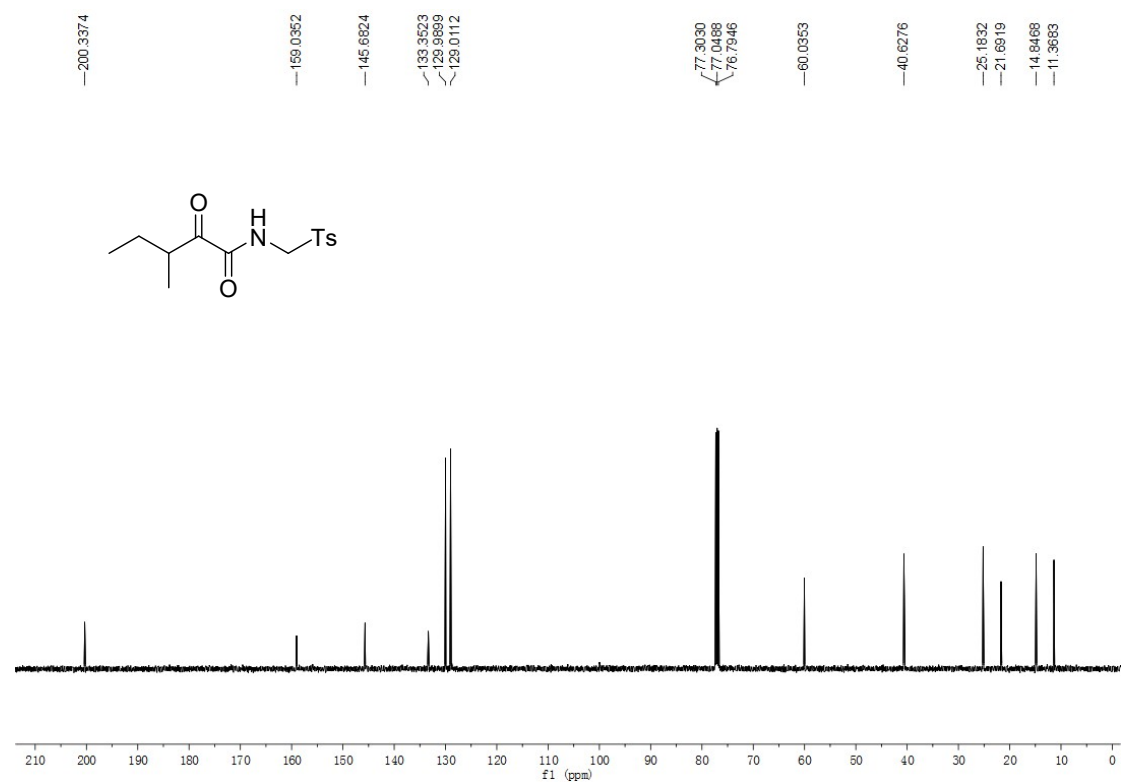

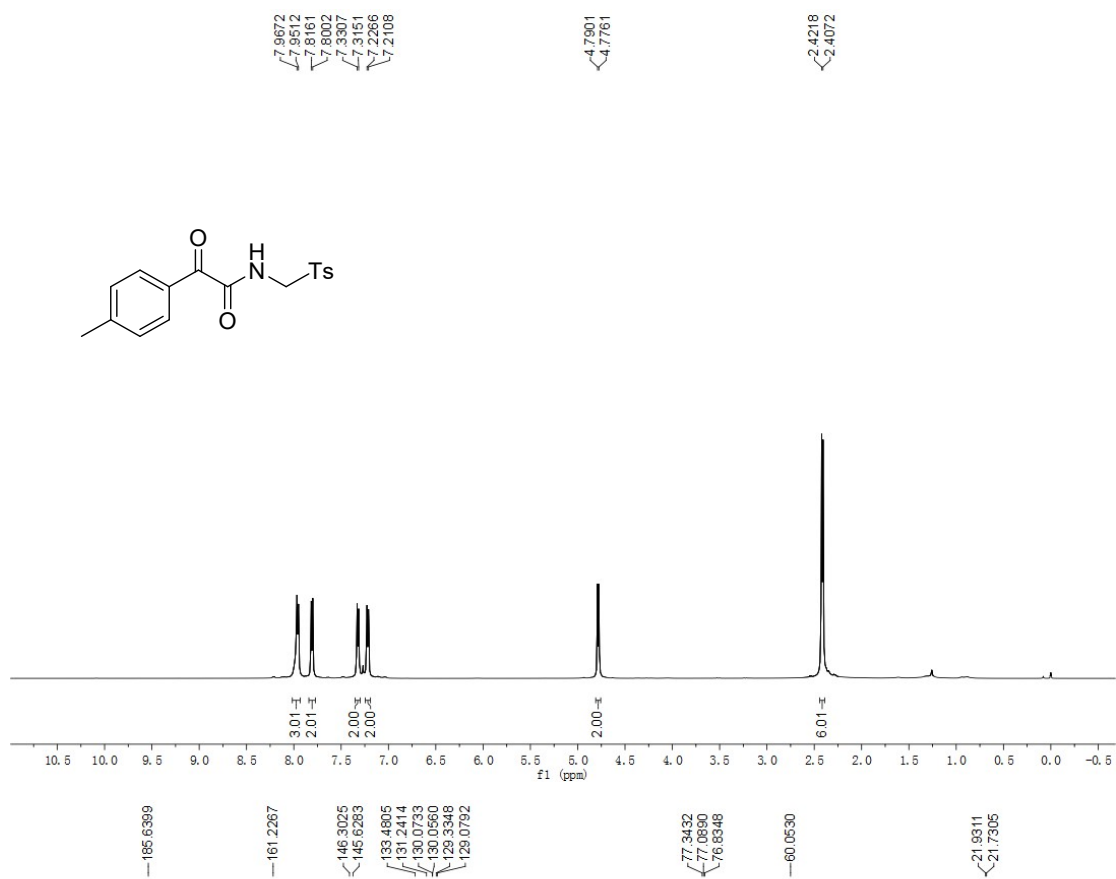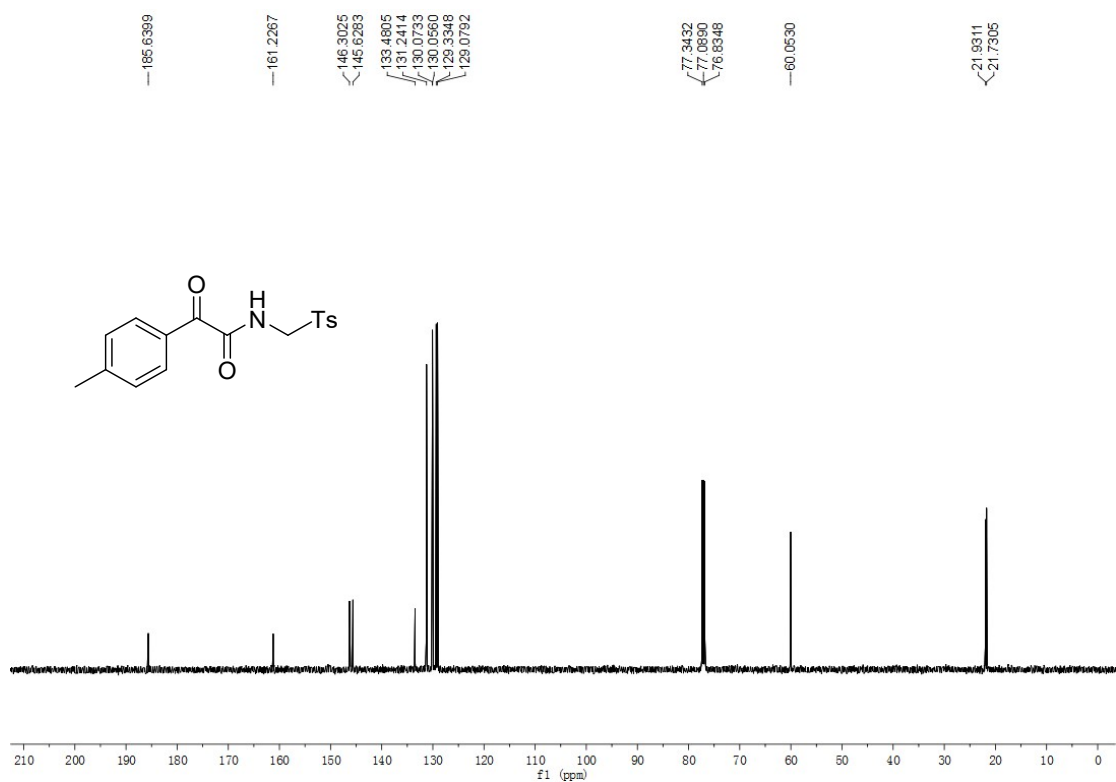

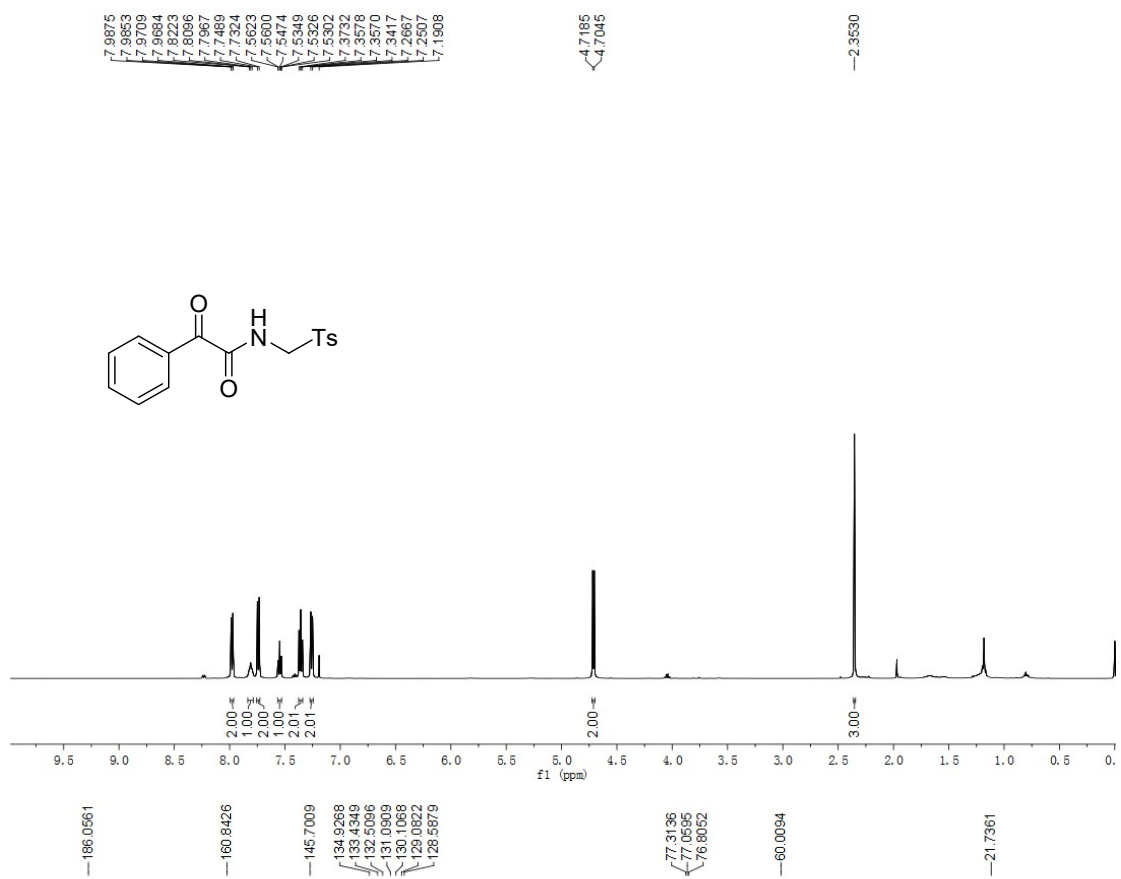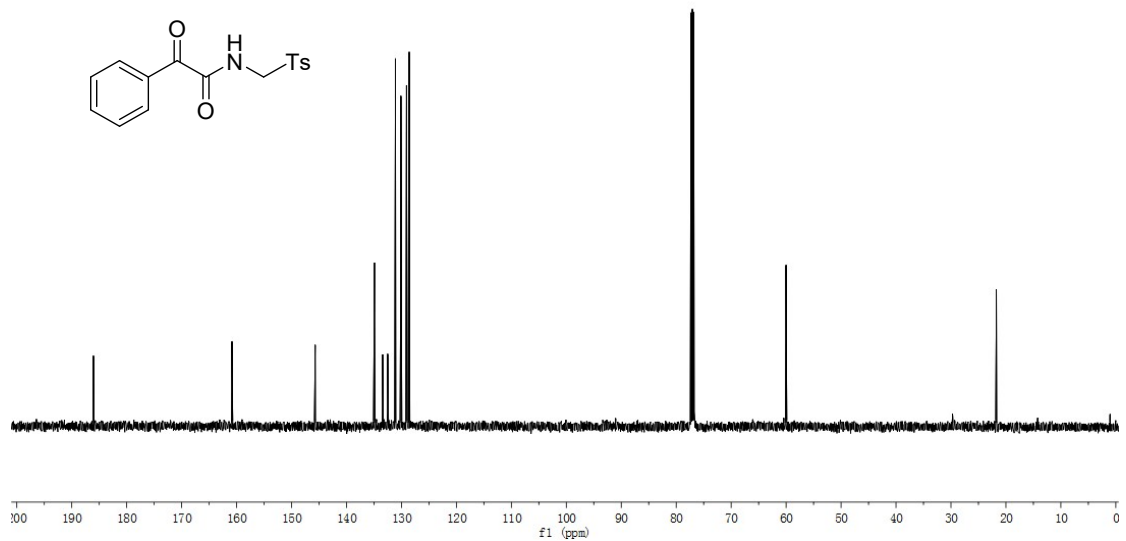

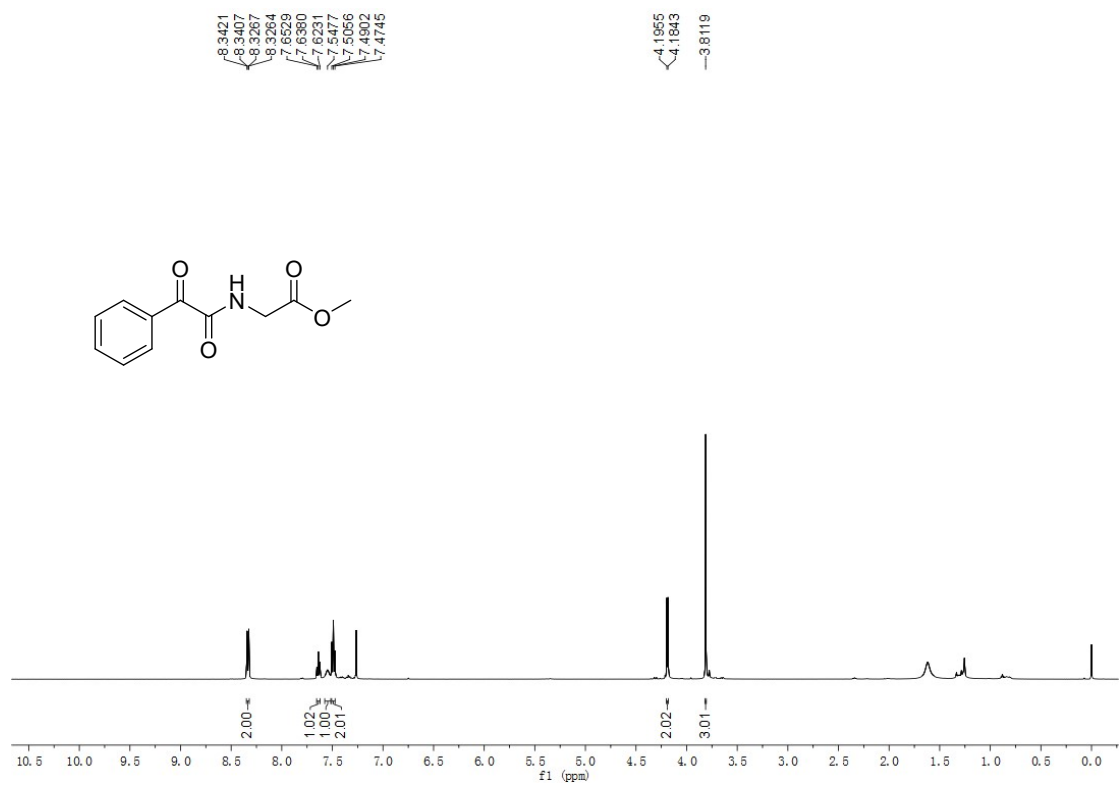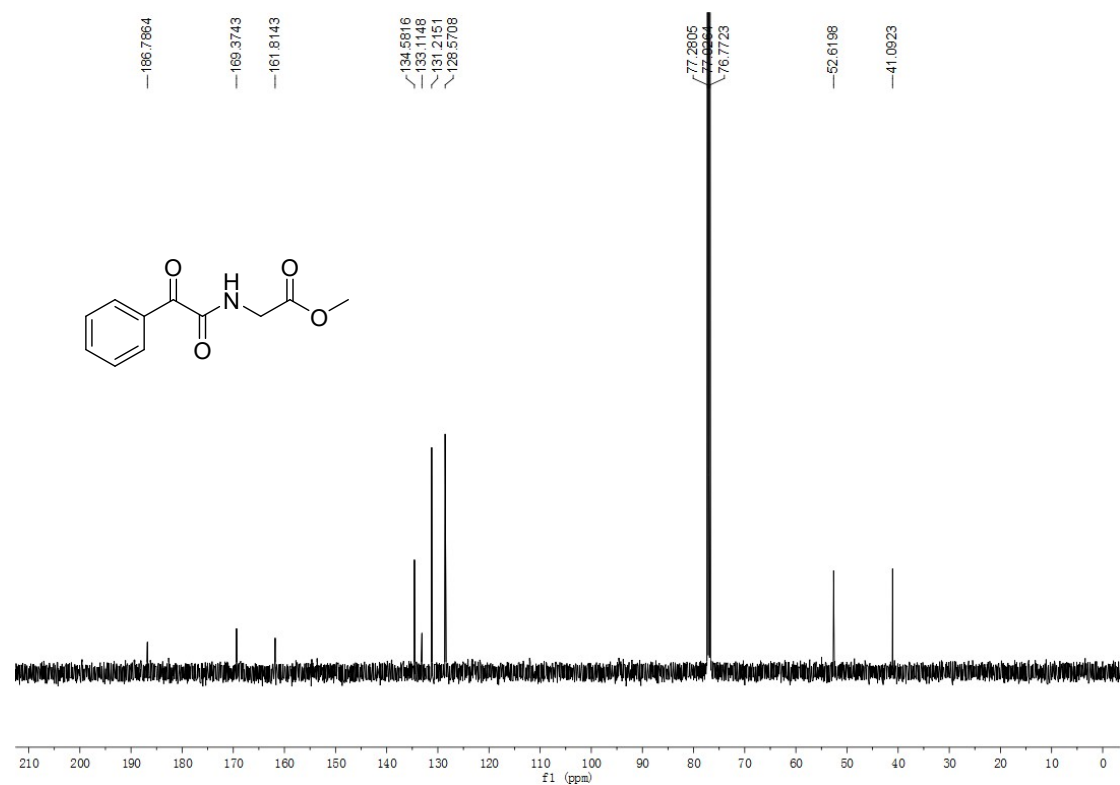



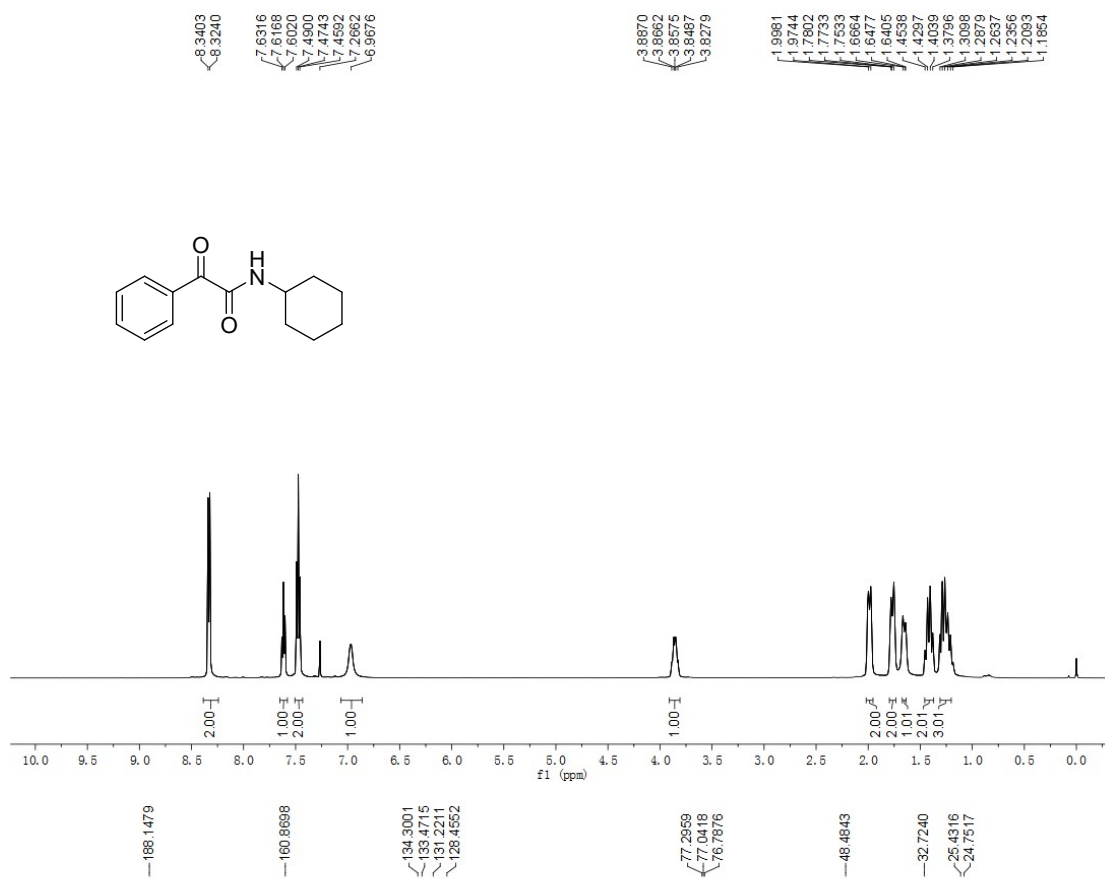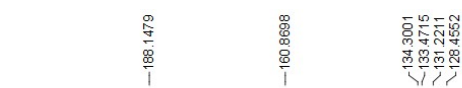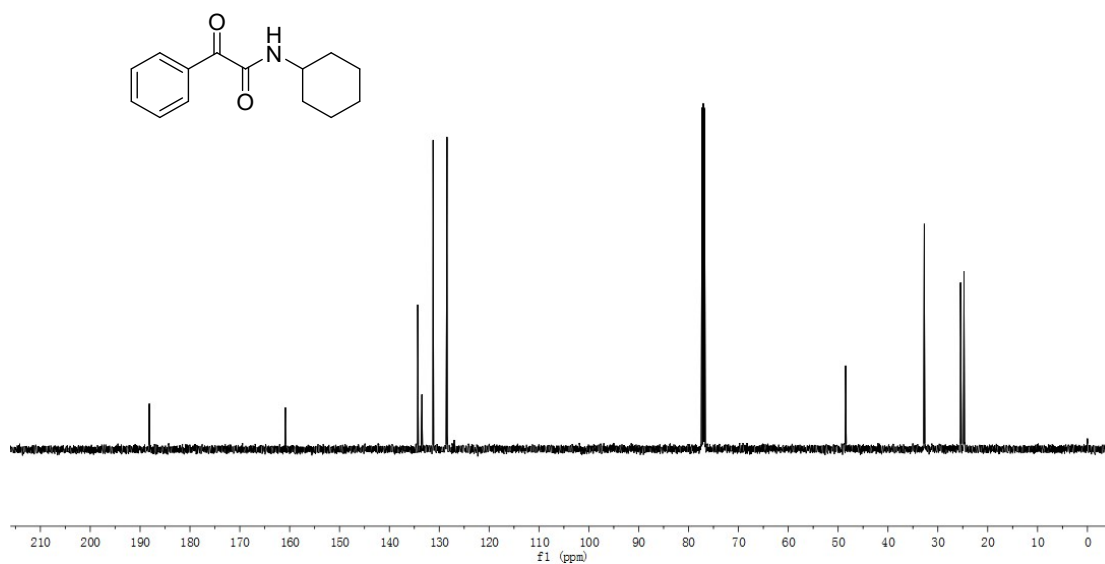

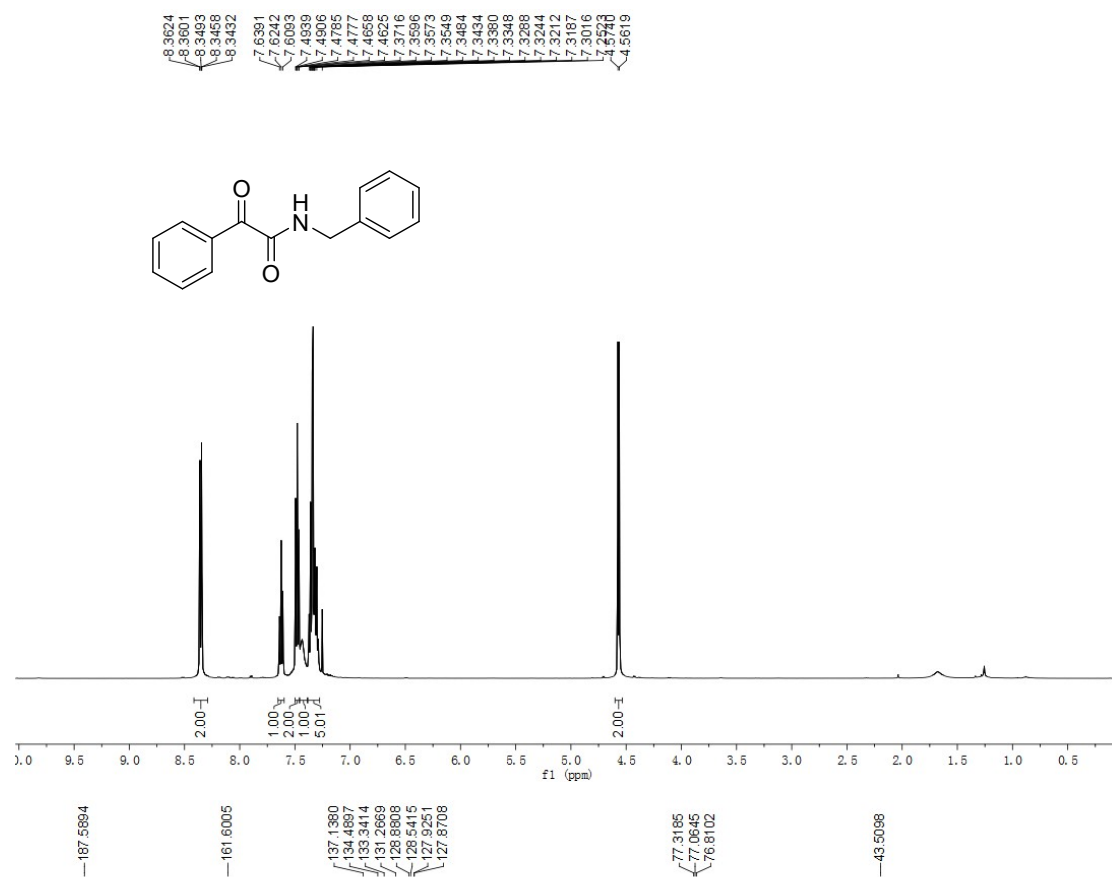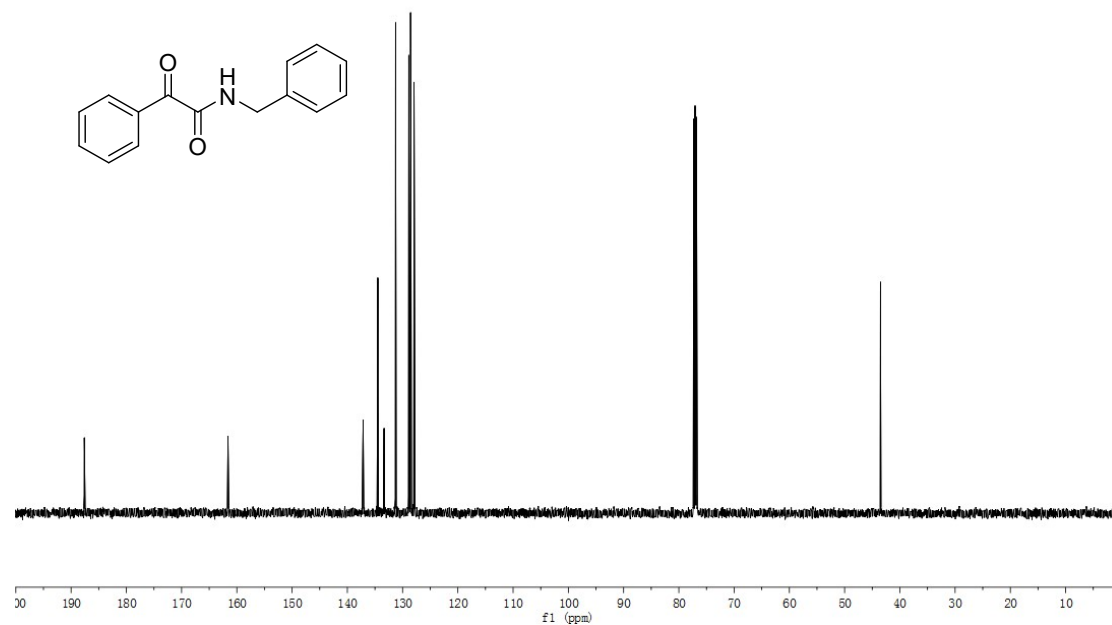

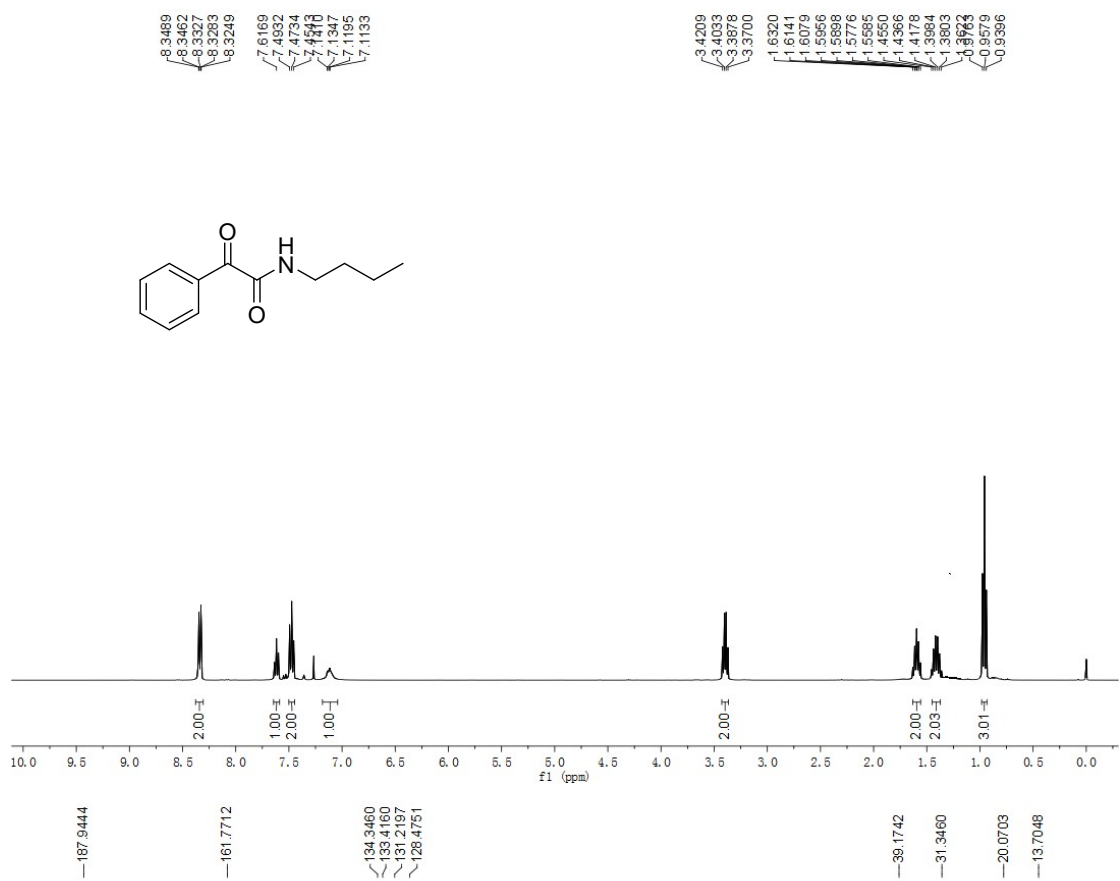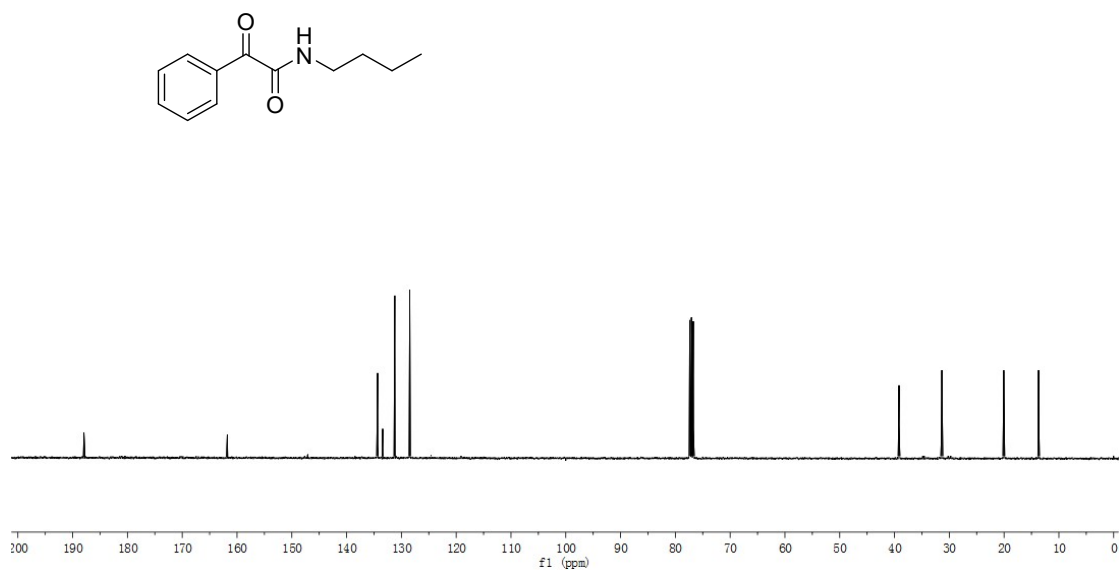

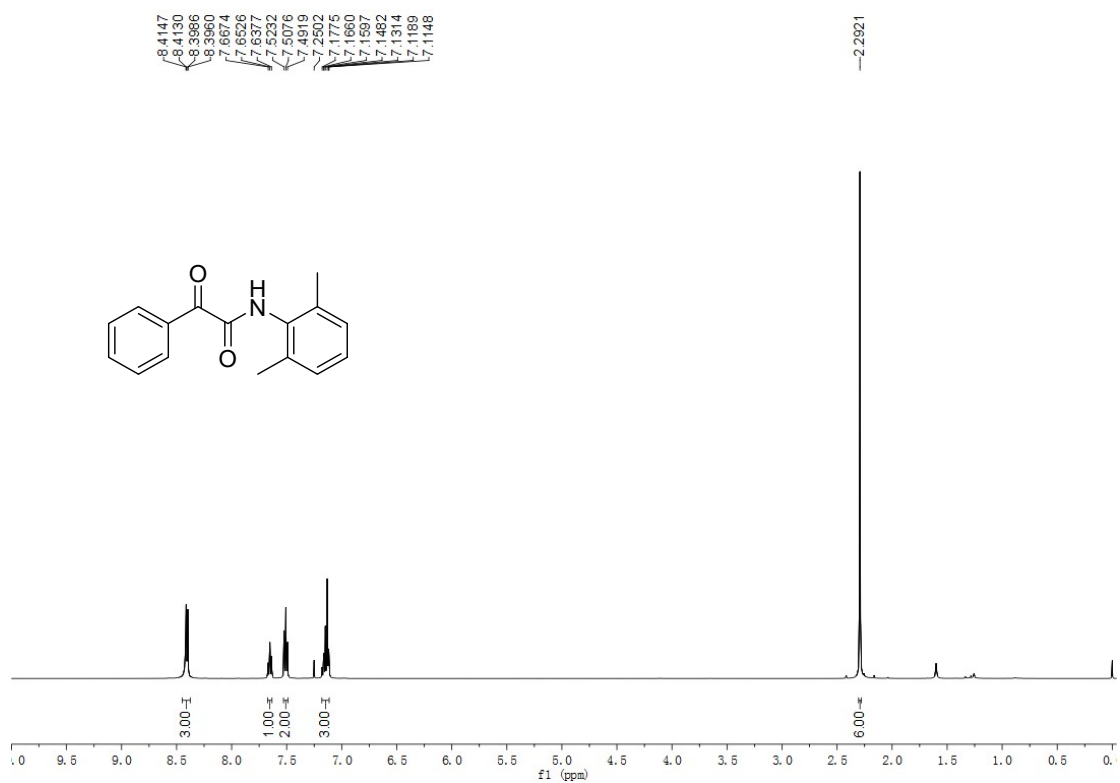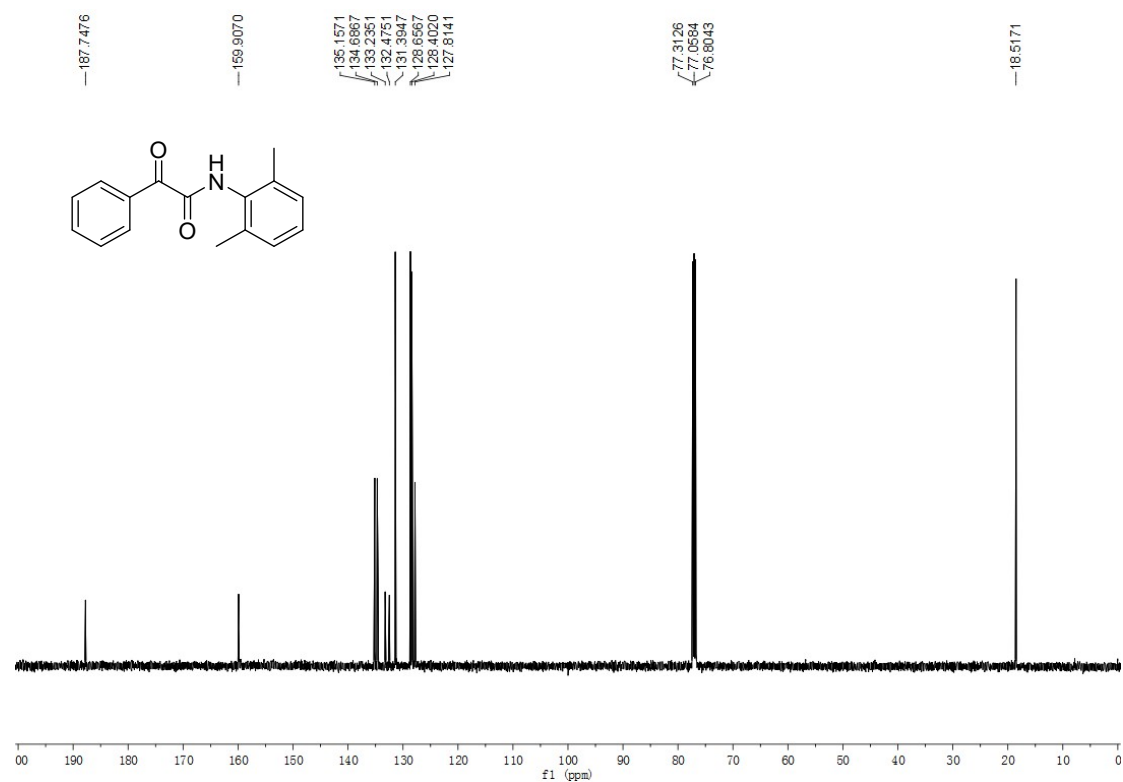

Supplement: d1qo01351c1.pdf [file d1qo01351c1.pdf]
